# Supplementary material for: One decade of “English as a medium of instruction” (EMI) in healthcare education
Source: Front Med (Lausanne). 2024 Feb 29;11:1296563. doi: 10.3389/fmed.2024.1296563 (PMC10937345; doi:10.3389/fmed.2024.1296563)
Supplement: Supplementary file 1 [file Table_1.XLSX]

## Sheet: Sheet 1 - 137 downloaded articl
APA style 6th edition	Decision	Authors	Country	Sample	Major	Tools	Method Type	aims	aims codes	Results	Recommendations	Author(s) ID	Title	Year	Source title	Volume	Issue	Art. No.	Page start	Page end	Cited by	DOI	Link	Affiliations	Authors with affiliations	Abstract	Author Keywords	Index Keywords	Funding Details	Funding Text 1	Funding Text 2	Correspondence Address	Publisher	ISSN	CODEN	PubMed ID	Language of Original Document	Abbreviated Source Title	Publication Stage	Open Access	Source	EID
Al Zumor, A. Q. (2019). Challenges of using emi in teaching and learning of university scientific disciplines: Student voice. International Journal of Language Education, 3(1), 74-90. doi:10.26858/ijole.v1i1.7510	Ok	Al Zumor A.Q.	Saudi	Students	Computer Science, Engineering, and Medicine	questionnaire	Mixed	This study examines the challenges of using English medium instruction (EMI) in teaching and learning scientific disciplines. The main objective of the study is to identify students’ perceptions regarding lecture comprehension, communication, pedagogy, assessment, and affect in an EMI setting.	Challenges	The major findings of the study are: a) using English language to teach scientific disciplines has a seriously negative impact on the scientific content comprehension and assessment of a majority of the students in the present study, b) using English language as the medium of instruction and assessment causes anxiety, frustration, tension, fear, embarrassment and, ultimately, poor educational out…	The study recommends ensuring quality English education in the foundation year and examining the option of “additive bilingual education.”	34976179900;	Challenges of using emi in teaching and learning of university scientific disciplines: Student voice	2019	International Journal of Language Education	3	1		74	90	12	10.26858/ijole.v1i1.7510	https://www.scopus.com/inward/record.uri?eid=2-s2.0-85082805856&doi=10.26858%2fijole.v1i1.7510&partnerID=40&md5=9067b9cd7ef7263eac62f629781e094c	King Khalid University, Saudi Arabia	Al Zumor, A.Q., King Khalid University, Saudi Arabia	This study examines the challenges of using English medium instruction (EMI) in teaching and learning scientific disciplines. The main objective of the study is to identify students’ perceptions regarding lecture comprehension, communication, pedagogy, assessment, and affect in an EMI setting. The participants in this study are 264 Saudi students who study Computer Science, Engineering, and Medic…	Arabic medium instruction; English medium instruction; Higher education; Language barrier; Language education policy; Lecture comprehension					Al Zumor, A.Q.; King Khalid UniversitySaudi Arabia; email: aalzomr@kku.edu.sa	Universitas Negeri Makassar- Faculty of Languages and Literature	25488457			English	Int. J. Lang. Educ.	Final	All Open Access, Gold	Scopus	2-s2.0-85082805856
Al-Zubi, D., El-Sharif, A., & Alzoubi, K. H. (2022). Changes in the attitudes of professors and students of medicine towards arabicizing medical terms in the faculties of medicine: A study from jordan. Heliyon, 8(12) doi:10.1016/j.heliyon.2022.e12022	Ok	Al-Zubi D., El-Sharif A., Alzoubi K.H.	Jordan	Students and Teachers	Healthcare	Two questionnaire: teachers and students	Quantitative	This study aimed to investigate changes in awareness, attitudes, acceptability, and possible barriers to using Arabicized medical terms in teaching and daily communication in medical colleges in Jordan	attitudes, arabization	Results of the current study showed positive awareness/acceptability and attitudes among medicine students toward Arabicized medical terms. The most common perceived barriers toward Arabicization among medicine students were that teaching and assessments (exams, quizzes, projects, etc.) are in English and the unavailability of valuable medical references that use Arabic terms	the current study indicated a generally more suitable environment for utilizing Arabicized medical terms, especially when delineating major barriers facing medicine students and professors.	58010288200;55301092200;8579544200;	Changes in the attitudes of professors and students of medicine towards arabicizing medical terms in the faculties of medicine: A study from Jordan	2022	Heliyon	8	12	e12022				10.1016/j.heliyon.2022.e12022	https://www.scopus.com/inward/record.uri?eid=2-s2.0-85143971630&doi=10.1016%2fj.heliyon.2022.e12022&partnerID=40&md5=b1d8fdb21fc4b4c83803d53ad024c455	Department of English Language and Literature, Al al-Bayt University, Jordan; Department of Clinical Pharmacy, Jordan University of Science and Technology, Jordan	Al-Zubi, D., Department of English Language and Literature, Al al-Bayt University, Jordan; El-Sharif, A., Department of English Language and Literature, Al al-Bayt University, Jordan; Alzoubi, K.H., Department of Clinical Pharmacy, Jordan University of Science and Technology, Jordan	This study aimed to investigate changes in awareness, attitudes, acceptability, and possible barriers to using Arabicized medical terms in teaching and daily communication in medical colleges in Jordan. Using a cross-sectional online survey, medicine students and professors in Jordanian universities were sampled to survey their awareness, attitudes, and barriers toward Arabicized medical terms. R…	Arabicization; Attitudes; Awareness; Barriers; Jordan; Language planning; Medical terms; Medicine					El-Sharif, A.; Department of English Language and Literature, Jordan; email: a.el-sharif@aabu.edu.jo	Elsevier Ltd	24058440			English	Heliyon	Final	All Open Access, Gold, Green	Scopus	2-s2.0-85143971630
Alenezi, M. Q., & Kebble, P. G. (2018). Investigating saudi medical students' attitudes towards english-arabic code-switching in classroom instruction. Asian ESP Journal, 14(1), 147-166. Retrieved from www.scopus.com	Ok	Alenezi M.Q., Kebble P.G.	Saudi	Students	Healthcare	questionnaire	Quantitative	The present study aimed to investigate a group of monolingual Arabic-speaking Saudi Arabian medical students and their attitudes towards the medium of instruction and codeswitching within their classroom	attitudes, codeswitching	A quantitative analysis of research data collected from 189 students (male and female) through the use of questionnaires, revealed there was a strong preference for using code-switching over a monolingual medium of instruction.	These findings suggest managers of learning and teaching should consider revising their monolingual language policies to embrace the positives within learning that code-switching can provide.	57202999781;57930254000;	Investigating Saudi medical students' attitudes towards English-Arabic code-switching in classroom instruction	2018	Asian ESP Journal	14	1		147	166	2		https://www.scopus.com/inward/record.uri?eid=2-s2.0-85050197794&partnerID=40&md5=bd12bb169f5a85f7b939fb973c8e10af	College of Art Law and Education, University of Tasmania, Australia; National Institute of Education, Singapore	Alenezi, M.Q., College of Art Law and Education, University of Tasmania, Australia; Kebble, P.G., National Institute of Education, Singapore	The present study aimed to investigate a group of monolingual Arabic-speaking Saudi Arabian medical students and their attitudes towards the medium of instruction and code-switching within their classroom. A quantitative analysis of research data collected from 189 students (male and female) through the use of questionnaires, revealed there was a strong preference for using code-switching over a …	Code-switching; EFL; Medical students; Medium of instruction; Monolingual classrooms; Saudi arabian learners						Asian EFL Journal Press	18333001			English	Asian ESP J.	Final		Scopus	2-s2.0-85050197794
Alfakhry, G. M., Dashash, M., & Jamous, I. (2020). Native arabic language use acceptability and adequacy in health professional instruction: Students and faculty's perspectives. Health Professions Education, 6(4), 454-464. doi:10.1016/j.hpe.2020.06.004	Ok	Alfakhry G.M., Dashash M., Jamous I.	Syria	Students and Teachers	Healthcare	Three questionnaire	Quantitative	This study had three main purposes which were (a) to assess the adequacy and desirability of Arabic in health professional instruction by investigating students and teachers’ perspectives and attitudes, (b) to explore aspects of Arabic medical translations which are not meeting expectations, and lastly, (c) to examine whether the level of education is a predictor of attitude.	attitudes, translation	Overall attitudes toward Arabic as a language of instruction were relatively negative. Students consistently exhibited a preference for English as the language of instruction. The one-way Welch’s ANOVA test found a significant difference among the main subgroups (undergraduates, postgraduates, faculty). Findings also showed that students and teachers suffer from the inadequacy of Arabic medical t…	these results suggest that Syrian medical schools are missing many elemental factors in their choice of language, such as providing or training professional medical translators. This research has thrown up many questions in need of further investigation. Future research on this topic should use qualitative interviewing or focus groups to investigate career threats posed by the inadequacy of Arabi…	57561236400;14061919700;15755670200;	Native Arabic Language Use Acceptability and Adequacy in Health Professional Instruction: Students and Faculty's Perspectives	2020	Health Professions Education	6	4		454	464	1	10.1016/j.hpe.2020.06.004	https://www.scopus.com/inward/record.uri?eid=2-s2.0-85132286412&doi=10.1016%2fj.hpe.2020.06.004&partnerID=40&md5=70b4242e3a9f144f2365a6a685c78c7a	Faculty of Dentistry, Damascus University; Department of Paediatric Dentistry, Faculty of Dentistry, Damascus University; Department of Fixed Prosthodontics, Faculty of Dentistry, Damascus University	Alfakhry, G.M., Faculty of Dentistry, Damascus University; Dashash, M., Department of Paediatric Dentistry, Faculty of Dentistry, Damascus University; Jamous, I., Department of Fixed Prosthodontics, Faculty of Dentistry, Damascus University	Purpose: This study had three main purposes which were (a) to assess the adequacy and desirability of Arabic in health professional instruction by investigating students and teachers’ perspectives and attitudes, (b) to explore aspects of Arabic medical translations which are not meeting expectations, and lastly, (c) to examine whether the level of education is a predictor of attitude. Method: A q…	Attitudes; Health belief model; Language of instruction; Qualitative/quantitative analysis; Syria	adult; analysis of variance; Arabic (language); article; attitude; career; dental student; expectation; female; field study; Health Belief Model; human; human experiment; major clinical study; male; medical education; perception; postgraduate student; quantitative analysis; questionnaire; Syrian Arab Republic; teacher; theoretical study		Our deep sense of gratitude to all those who participated in the survey. The authors would like to thank Mohammad Ani for helping us revise the language of the paper, and we would also like to extend thanks to Diaa Al-Fattal and Khattab Mustafa for their good advice and guidance.		Alfakhry, G.M.; Faculty of Dentistry, Al-Mazze Highway, Syrian Arab Republic; email: ghaithalfakhry@gmail.com	King Saud bin Abdulaziz University	24523011			English	Health Prof. Educ.	Final	All Open Access, Gold	Scopus	2-s2.0-85132286412
Alhamami, M., & Almelhi, A. (2021). English or arabic in healthcare education: Perspectives of healthcare alumni, students, and instructors. Journal of Multidisciplinary Healthcare, 14, 2537-2547. doi:10.2147/JMDH.S330579	Ok	Alhamami M., Almelhi A.	Saudi	Students and Teachers	Healthcare	Two questionnaire: teachers and students and Alumni Records	Quantitative	The present study collected data to examine the impact of the EMI policy and analyze the experiences of students and instructors in a healthcare course in Saudi Arabia	impact, alumni, attitudes	The results of alumni data from healthcare colleges of the last five years revealed that the cumulative grade point average (GPA) can be predicted by the first semester grades of the students in the intensive English proficiency program. The results of the questionnaires indicate that the healthcare students’ perspectives and healthcare instructors’ views demonstrate that using EMI to teach healt…	Policymakers should focus on improving the English proficiency of students and provide ongoing English language learning opportunities for the complete duration of the healthcare programs	57190443902;57264878200;	English or arabic in healthcare education: Perspectives of healthcare alumni, students, and instructors	2021	Journal of Multidisciplinary Healthcare	14			2537	2547	1	10.2147/JMDH.S330579	https://www.scopus.com/inward/record.uri?eid=2-s2.0-85115226649&doi=10.2147%2fJMDH.S330579&partnerID=40&md5=7b9246369d5a2eef1ccd213d2c27f1cf	English Department, Faculty of Languages and Translation, King Khalid University, Abha, Saudi Arabia	Alhamami, M., English Department, Faculty of Languages and Translation, King Khalid University, Abha, Saudi Arabia; Almelhi, A., English Department, Faculty of Languages and Translation, King Khalid University, Abha, Saudi Arabia	Background: Using English as a medium of instruction (EMI) in non-English speaking countries to teach healthcare subjects has been questioned in various international healthcare educational contexts, despite the numerous benefits it offers to students and institutions. Purpose: The present study collected data to examine the impact of the EMI policy and analyze the experiences of students and ins…	Arabic in healthcare education; English as a medium of instruction; English in health professions training; Medical education; Saudi medical education	academic achievement; adult; alumnus; article; dentistry; English (language); English proficiency; female; health program; health student; human; human experiment; language development; major clinical study; male; medical education; nursing; pharmacy school; questionnaire; Saudi Arabia	Deanship of Scientific Research, King Faisal University, DSR, KFU; King Khalid University, KKU: G.R.P-152 −40	The authors extend their appreciation to the Deanship of Scientific Research at King Khalid University for funding this work through General Research Project under grant number (G.R.P-152 −40).	This work was supported by King Khalid University [grant number G.R.P-152 −40].	Alhamami, M.; English Department, POB 9100, Saudi Arabia; email: munassir7@gmail.com	Dove Medical Press Ltd	11782390			English	J. Multidiscip.Healthc.	Final	All Open Access, Gold, Green	Scopus	2-s2.0-85115226649
Alrajhi, Z., Alhamdan, A., Alshareef, M., Almubaireek, O., Mahmoud, M., Omair, A., . . . Hamad, B. (2019). Perspectives of medical students and teaching faculty on teaching medicine in their native language. [Points de vue des étudiants en médecine et du corps professoral concernant l’enseignement de la médecine dans leur langue maternelle] Eastern Mediterranean Health Journal, 25(8), 562-566. do…	Ok	Alrajhi Z., Alhamdan A., Alshareef M., Almubaireek O., Mahmoud M., Omair A., Masuadi E., Hamad B.	Saudi	Students and Teachers	Healthcare	Two questionnaire: teachers and students	Quantitative	This study explored the perspectives of medical faculty and students at a college in Saudi Arabia on the language of instruction in medical education.	attitudes, instructors	The total number of students and faculty who responded were 468 (76%) and 37 (93%) respectively. Most students and faculty members agreed that studying in English enables a better access to medical information (n=457, 91%) and more job opportunities (n=419, 83%). Less than 15% of the students preferred to be taught in Arabic in most of the curriculum aspects except for communication skills (n=131…	Most medical students and faculty members preferred English as the language of instruction for medical education and did not believe that teaching medicine in Arabic should be sought as a future goal	57211260565;57211259530;57211259500;57211260097;57211259787;57210616403;13411357400;23496425300;	Perspectives of medical students and teaching faculty on teaching medicine in their native language [Points de vue des étudiants en médecine et du corps professoral concernant l’enseignement de la médecine dans leur langue maternelle]	2019	Eastern Mediterranean Health Journal	25	8		562	566	7	10.26719/emhj.18.073	https://www.scopus.com/inward/record.uri?eid=2-s2.0-85073181715&doi=10.26719%2femhj.18.073&partnerID=40&md5=01d3c05d2fda5dd1fc13ece707bdb94f	College of Medicine, King Saud bin Abdulaziz University for Health Sciences, Riyadh, Saudi Arabia; Department of Medical Education, College of Medicine, King Saudi bin Abdulaziz University for Health Sciences, Riyadh, Saudi Arabia; Sudan Medical Specialization Board, Sudan Khartoum International University of Africa, Khartoum, Sudan	Alrajhi, Z., College of Medicine, King Saud bin Abdulaziz University for Health Sciences, Riyadh, Saudi Arabia; Alhamdan, A., College of Medicine, King Saud bin Abdulaziz University for Health Sciences, Riyadh, Saudi Arabia; Alshareef, M., College of Medicine, King Saud bin Abdulaziz University for Health Sciences, Riyadh, Saudi Arabia; Almubaireek, O., College of Medicine, King Saud bin Abdulazi…	Background: One of the basic policy questions to be decided at the inception of medical education institutes is the language of instruction. Aims: This study explored the perspectives of medical faculty and students at a college in Saudi Arabia on the language of instruction in medical education. Methods: A cross-sectional survey of undergraduate medical students and full-time faculty members at …	Arabic; English; Medical education; Native language; Saudi Arabia	adult; article; clinical examination; communication skill; controlled study; curriculum; female; human; human experiment; language; major clinical study; male; medical education; medical information; medical school; medical student; questionnaire; Saudi Arabia; clinical competence; cross-sectional study; education; interpersonal communication; medical school; medical student; middle aged; psychol…		Funding: This work was supported by the King Abdul-lah International Medical Research Center, Riyadh, Saudi Arabia.		Alrajhi, Z.; College of Medicine, Saudi Arabia; email: alrajhiziyad@gmail.com	World Health Organization	10203397	EMHJA	31612970	English	East. Mediterr. Health J.	Final	All Open Access, Bronze	Scopus	2-s2.0-85073181715
Alshareef, M., Mobaireek, O., Mohamud, M., Alrajhi, Z., Alhamdan, A., & Hamad, B. (2018). Decision makers’ perspectives on the language of instruction in medicine in saudi arabia: A qualitative study. Health Professions Education, 4(4), 308-316. doi:10.1016/j.hpe.2018.03.006	Ok	Alshareef M., Mobaireek O., Mohamud M., Alrajhi Z., Alhamdan A., Hamad B.	Saudi	Decision Makers	Healthcare	Interviews	Qualitative	This study explored the perspectives of decision-makers on the choice of English language for medical instruction in Saudi Arabia, in addition to, the academic, economic and social impact of this choice. This paper also explores their awareness of the languages used currently and in the past for teaching medicine and what obstacles are expected if Arabic language is adopted as the language of ins…	attitudes of decision makers	All decision-makers expressed a positive attitude towards the choice of English for medical instruction, but there was also an overall support for a future Arabic curriculum, once obstacles are overcome. The availability of medical resources was the main factor which decision-makers agreed upon for the choice of language. There was also a consensus on the need to introduce Arabic in teaching comm…	There is an overwhelming preference of choice for the English language over Arabic language for medical instruction. The adaptation of Arabic language was seen to have major obstacles but could be overcome through a given nationwide initiative. It is recommended to have future studies in assessing periodic changes in the perspective of choice of language in medicine.	57211259500;57202801531;57205547614;57211260565;57211259530;23496425300;	Decision Makers’ Perspectives on the Language of Instruction in Medicine in Saudi Arabia: A Qualitative Study	2018	Health Professions Education	4	4		308	316	9	10.1016/j.hpe.2018.03.006	https://www.scopus.com/inward/record.uri?eid=2-s2.0-85072333341&doi=10.1016%2fj.hpe.2018.03.006&partnerID=40&md5=a1b4ba8513917c786e3b2b6cdf3337e8	King Saud bin Abdulaziz University for Health Sciences, Al Hars Al Watani, Ar Rimayah, Riyadh, Saudi Arabia; King Saud bin Abdulaziz University for Health Sciences, Riyadh, Saudi Arabia; King Saud bin Abdulaziz University for Health Sciences Department of Medical Education Riyadh, Saudi Arabia; Sudan Medical Specialization Board, Sudan Khartoum, International University of Africa, Khartoum, Sudan…	Alshareef, M., King Saud bin Abdulaziz University for Health Sciences, Al Hars Al Watani, Ar Rimayah, Riyadh, Saudi Arabia; Mobaireek, O., King Saud bin Abdulaziz University for Health Sciences, Riyadh, Saudi Arabia; Mohamud, M., King Saud bin Abdulaziz University for Health Sciences Department of Medical Education Riyadh, Saudi Arabia; Alrajhi, Z., King Saud bin Abdulaziz University for Health S…	Background: The main language of instruction for teaching medicine in most of the Arabic-speaking countries is English then French to a lesser extent. To our knowledge, Syria is the only Arab country that uses Arabic as the language of instruction in its medical colleges. Objective: This study explored the perspectives of decision-makers on the choice of English language for medical instruction i…	Decision makers; Education; Language of instruction; Qualitative; Teaching	Arabic (language); article; awareness; communication skill; consensus; curriculum; English (language); genetic transcription; human; human experiment; medical education; medicine; periodicity; qualitative research; Saudi Arabia; semi structured interview		English editing was done by Editage.		Alshareef, M.; King Saud bin Abdulaziz University for Health Sciences, Al Hars Al Watani, Ar Rimayah, Saudi Arabia; email: M.alshareef888@gmail.com	King Saud bin Abdulaziz University	24523011			English	Health Prof. Educ.	Final	All Open Access, Gold	Scopus	2-s2.0-85072333341
Alsuliman, T., Alasadi, L., Mouki, A., & Alsaid, B. (2019). Language of written medical educational materials for non-english speaking populations: An evaluation of a simplified bi-lingual approach. BMC Medical Education, 19(1) doi:10.1186/s12909-019-1846-x	Ok	Alsuliman T., Alasadi L., Mouki A., Alsaid B.	Syria	Students	Healthcare	Test Experiement	Quantitative	This study aimed to evaluate one of the simplified bi-lingual approaches in terms of medical-educational-written texts for a non-English speaking population: Arabic speaking medical students in specific	bi-lingual policy	Participants scored a mean of [0.10] for the Arabic paragraph, [0.72] for the hybrid paragraph, and [0.24] for the English paragraph (P < 0.001). Results showed a significantly higher mean of points and correct answers within the fastest time for the hybrid paragraph [0.68] compared to the Arabic [0.08] and English [0.18] paragraphs (P < 0.001). Moreover, 50% of participants preferred the hybrid …	Taking into consideration the large number of participants and the statistically significant results, authors propose that simplified Arabic combined with English terminology may present a viable alternative method for medical-educational-written texts in Arabic-speaking population.	57197806583;57211677704;57211690265;26533774100;	Language of written medical educational materials for non-English speaking populations: An evaluation of a simplified bi-lingual approach	2019	BMC Medical Education	19	1	418			13	10.1186/s12909-019-1846-x	https://www.scopus.com/inward/record.uri?eid=2-s2.0-85074847986&doi=10.1186%2fs12909-019-1846-x&partnerID=40&md5=dc80def2c3be54d16cd194e5d121e5ca	Service d'Hématologie, Centre Hospitalier Régional Universitaire de Lille, Lille, France; Service d'Hématologie, Hôpital Saint-Antoine, AP-HP, Sorbonne Université, Paris, 75012, France; Department of Gastroenterology and Hepatology, Al-Mouasat University Hospital, Damascus, Syrian Arab Republic; Majkop State Technological University, Faculty of Pharmacy, Maykop, 385000, Russian Federation; Labora…	Alsuliman, T., Service d'Hématologie, Centre Hospitalier Régional Universitaire de Lille, Lille, France, Service d'Hématologie, Hôpital Saint-Antoine, AP-HP, Sorbonne Université, Paris, 75012, France; Alasadi, L., Department of Gastroenterology and Hepatology, Al-Mouasat University Hospital, Damascus, Syrian Arab Republic; Mouki, A., Majkop State Technological University, Faculty of Pharmacy, May…	Background: Debates have arisen in various non-English speaking countries over the chosen language of instruction in medical education, whether it has to be the English language or the mother tongue. English-based education supporters argue that English is the leading international language of medicine and research, and a crucial tool for Continuing Medical Education (CME), as well as for student…	Alternative; Comprehension; Hybrid approach; Language; Medical education	adult; analysis of variance; article; comprehension; female; human; human experiment; language; major clinical study; medical education; medical student; multiple choice test; nomenclature; reaction time; speech; tongue; Arab; education; male; medical education; multilingualism; procedures; questionnaire; Syrian Arab Republic; teaching; translating (language); young adult; Arabs; Education, Medic…	University of Houston, UH	The authors would like to thank the participants. Authors would like also to thank the Syrian Researchers and its collaborated platforms for their help in launching the survey online. The authors are grateful for Cham Said from Las Positas College, USA, Danah El-Refaie from University of Houston, USA, and Dr. Hasan Iessa, PhD., UK, for proof reading of this manuscript. And for Amer Hatem for the …		Alasadi, L.; Department of Gastroenterology and Hepatology, Syrian Arab Republic; email: lugienalasadi@gmail.com	BioMed Central Ltd.	14726920		31711476	English	BMC Med. Educ.	Final	All Open Access, Gold, Green	Scopus	2-s2.0-85074847986
Dube, M. B., & Mlotshwa, P. R. (2018). Factors influencing enrolled nursing students' academic performance at a selected private nursing education institution in KwaZulu-natal. Curationis, 41(1), e1-e7. doi:10.4102/curationis.v41i1.1850	Ok	Dube M.B., Mlotshwa P.R.	South Africa	Students	Healthcare	questionnaire	Quantitative	he purpose of this study was to describe the perceptions of enrolled student nurses on factors influencing their academic performance in a private nursing school in KwaZulu-Natal, South Africa.	attitudes, students	The results showed that parental involvement in education, good and supportive relationships between nurse educators and students, classroom computer technological gadgets, internet connection and adequate learning facilities were perceived as fostering better academic performance of students. In contrast, poor family background, use of English language for classroom instruction as well as negati…	Nursing institutions should, therefore, select students with higher-level entry qualifications, early identify at-risk students, recruit more qualified nurse educators and upgrade their facilities	57205371698;57205371054;	Factors influencing enrolled nursing students' academic performance at a selected private nursing education institution in KwaZulu-Natal	2018	Curationis	41	1		e1	e7	19	10.4102/curationis.v41i1.1850	https://www.scopus.com/inward/record.uri?eid=2-s2.0-85059798052&doi=10.4102%2fcurationis.v41i1.1850&partnerID=40&md5=2df54c3711b07afb72e2e9fbb899a04b	School of Nursing and Public Health, University of KwaZulu-Natal	Dube, M.B., School of Nursing and Public Health, University of KwaZulu-Natal; Mlotshwa, P.R.	BACKGROUND: The success of any educational institution is measured by its academic performance or how well students meet the standards set out. Currently, nursing students' academic failure is a phenomenon of growing international interest because of its economic impact and its negative effects on the availability of future nurses in different health care systems. Factors identified as influencin…	Factors Influencing; Nursing School, South Africa; Students' Academic Performance	academic achievement; adolescent; clinical competence; female; human; male; nursing education; nursing student; psychology; South Africa; young adult; Academic Performance; Adolescent; Clinical Competence; Education, Nursing, Baccalaureate; Female; Humans; Male; Schools, Nursing; South Africa; Students, Nursing; Young Adult						22236279		30198293	English	Curationis	Final	All Open Access, Gold, Green	Scopus	2-s2.0-85059798052
Hijji, B. M. (2017). Flaws of multiple choice questions in teacher-constructed nursing examinations: A pilot descriptive study. Journal of Nursing Education, 56(8), 490-496. doi:10.3928/01484834-20170712-08	Ok	Hijji B.M.	Not specified	Analysis of text	Healthcare	Text (exams) analysis	Mixed	In many middle eastern universities, English is the medium of instruction and testing. As nurse educators construct multiple choice questions (MCQs), it is essential that items are developed to be valid and reliable to assess student learning. Method: This study examined the structure of 98 MCQs included in nursing examinations at three middle eastern universities using a checklist composed of 22…	exam structure	Ninety MCQs (91.8%) experienced one or more item-writing !aws. Examples of these included linguistic errors, various problems with the stem, and answer options. Of importance, most faculty did not use item analysis to assess the integrity of the examinations.	Results con"rm concerns about the standards faculty use for test construction and item analysis. Universities must ensure that the faculty they hired are !uent in English. Faculty would also bene"t from workshops that focus on test construction and the use of item analysis.	36650606300;	Flaws of multiple choice questions in teacher-constructed nursing examinations: A pilot descriptive study	2017	Journal of Nursing Education	56	8		490	496	9	10.3928/01484834-20170712-08	https://www.scopus.com/inward/record.uri?eid=2-s2.0-85027245815&doi=10.3928%2f01484834-20170712-08&partnerID=40&md5=019982545bc6b1925785cddfa5629bf9	Department of Nursing, Alghad International Colleges for Applied Medical Sciences, Najran, Saudi Arabia	Hijji, B.M., Department of Nursing, Alghad International Colleges for Applied Medical Sciences, Najran, Saudi Arabia	Background: In many middle eastern universities, English is the medium of instruction and testing. As nurse educators construct multiple choice questions (MCQs), it is essential that items are developed to be valid and reliable to assess student learning. Method: This study examined the structure of 98 MCQs included in nursing examinations at three middle eastern universities using a checklist co…		checklist; error; human; human experiment; multiple choice test; nursing; teacher; university; writing; association; comprehension; education; evaluation study; nursing education; organization and management; pilot study; standards; Checklist; Comprehension; Cues; Education, Nursing, Baccalaureate; Educational Measurement; Faculty, Nursing; Humans; Nursing Education Research; Pilot Projects; Writ…				Hijji, B.M.; Department of Nursing, 4988 King Abdul Aziz Road, Saudi Arabia; email: bhijji1@gmail.com	Slack Incorporated	1484834		28787072	English	J. Nurs. Educ.	Final		Scopus	2-s2.0-85027245815
Horwood, C., Mapumulo, S., Haskins, L., John, V., Luthuli, S., Tylleskär, T., . . . Hatløy, A. (2021). A North–South-south partnership in higher education to develop health research capacity in the democratic republic of the congo: The challenge of finding a common language. Health Research Policy and Systems, 19(1) doi:10.1186/s12961-021-00728-8	Ok	Horwood C., Mapumulo S., Haskins L., John V., Luthuli S., Tylleskär T., Mutombo P., Engebretsen I.M.S., Mapatano M.A., Hatløy A.	Congo	postgraduate students, admisntrators, stakeholders	Healthcare	interviews	Qualitative	Globally, increasing numbers of higher education institutions (HEIs) in non-English-speaking countries have adopted English as a medium of instruction (EMI), because of the perception that this provides opportunities to attract high-calibre students and academic staff, and engage with the international research community. We report an evaluation of a North–South-South collaboration to develop hea…	perceptions	Most participants viewed EMI positively, reporting that studying in English created opportunities to access relevant literature, improve interactions with the scientific community and advance their careers. As a result of adopting EMI, some students had opportunities to present research findings at international conferences and publish their research in English. English-speaking researchers from …	Partnerships between HEIs could be a powerful tool to develop research capacity in low-income countries in line with United Nations Sustainable Development Goals. EMI could be a solution to language barriers faced by many such partnerships, but wide-ranging support to develop English proficiency among staff and students is essential to ensure that the challenges do not outweigh the benefits.	26666096300;57220131143;32667611700;35965237500;57212446183;57202572412;55350371000;57202569413;23089202200;6603299952;	A North–South-South partnership in higher education to develop health research capacity in the Democratic Republic of the Congo: the challenge of finding a common language	2021	Health Research Policy and Systems	19	1	79			3	10.1186/s12961-021-00728-8	https://www.scopus.com/inward/record.uri?eid=2-s2.0-85105498359&doi=10.1186%2fs12961-021-00728-8&partnerID=40&md5=e40bca74697cc15d9ce5717c2fd40b06	Centre for Rural Health, School of Nursing and Public Health, University of KwaZulu-Natal, Durban, South Africa; School of Education, University of KwaZulu-Natal, Pietermaritzburg, South Africa; Centre for International Health, University of Bergen, Bergen, Norway; Kinshasa School of Public Health, University of Kinshasa, Kinshasa, Democratic Republic Congo; Fafo Institute for Labour and Social R…	Horwood, C., Centre for Rural Health, School of Nursing and Public Health, University of KwaZulu-Natal, Durban, South Africa; Mapumulo, S., Centre for Rural Health, School of Nursing and Public Health, University of KwaZulu-Natal, Durban, South Africa; Haskins, L., Centre for Rural Health, School of Nursing and Public Health, University of KwaZulu-Natal, Durban, South Africa; John, V., School of …	Background: Globally, increasing numbers of higher education institutions (HEIs) in non-English-speaking countries have adopted English as a medium of instruction (EMI), because of the perception that this provides opportunities to attract high-calibre students and academic staff, and engage with the international research community. We report an evaluation of a North–South-South collaboration to…	Africa; Democratic Republic of the Congo; English as a medium of instruction; Epidemiology; Higher education; Low- and middle-income countries; North–South-South; Nutrition; Partnerships; Research capacity	academic achievement; adult; article; career; communication barrier; Democratic Republic Congo; English (language); English proficiency; female; genetic transcription; human; human experiment; interview; low income country; male; medical research; middle income country; Norway; nutrition; perception; postgraduate student; public health; South Africa; speech; sustainable development; tertiary educ…	Direktoratet for Utviklingssamarbeid, NORAD	The programme was funded by the Norwegian Agency for Development Cooperation (Norad) through the Norwegian Programme for Capacity Development in Higher Education and Research for Development (NORHED).		Hatløy, A.; Centre for International Health, Norway; email: Anne.Hatloy@uib.no	BioMed Central Ltd	14784505		33962628	English	Health Res. Policy Syst.	Final	All Open Access, Gold, Green	Scopus	2-s2.0-85105498359
Joe, Y. J., & Lee, H. -. (2013). Does english-medium instruction benefit students in EFL contexts? A case study of medical students in korea. Asia-Pacific Education Researcher, 22(2), 201-207. doi:10.1007/s40299-012-0003-7	Ok	Joe Y.J., Lee H.-K.	Korea	Students	Healthcare	pre & post test and questionnaire	Quantitative	This study scrutinized relationships among Korean medical students’ comprehension of and satisfaction with English-medium lectures and their general English proficiency.	attitudes attitudes	It was found that the medium of instruction had no effect on the understanding of the lecture and that students’ general English proficiency was not related to their lecture comprehension. In the survey, students expressed diverse needs for English such as LI summaries of main points and remedial English courses in general or medical English	The findings of the study provide supporting evidence for the effectiveness of EMI and the great potential of successfully implementing EMI in higher education in Korea. When the content of an English-medium lecture is highly technical and embedded with specialized jargon and concepts like medical subjects, and when students’ general English level is sufficient enough to understand the content in…	55984750600;16834897800;	Does English-Medium Instruction Benefit Students in EFL Contexts? A Case Study of Medical Students in Korea	2013	Asia-Pacific Education Researcher	22	2		201	207	64	10.1007/s40299-012-0003-7	https://www.scopus.com/inward/record.uri?eid=2-s2.0-84891613618&doi=10.1007%2fs40299-012-0003-7&partnerID=40&md5=a3adf506de8a5c64cf224539caf19afb	Yonsei University, Seoul, South Korea	Joe, Y.J., Yonsei University, Seoul, South Korea; Lee, H.-K., Yonsei University, Seoul, South Korea	With an increase in English-medium courses in universities in non-English speaking countries, various concerns have been raised such as difficulty of students' lecture comprehension and ineffective interaction between lecturers and students. This study scrutinized relationships among Korean medical students' comprehension of and satisfaction with English-medium lectures and their general English …	EMI; English for academic purposes; Medical education; Medium of instruction					Lee, H.-K.; Yonsei University, Seoul, South Korea; email: heelee@yonsei.ac.kr		1195646			English	Asia Pac. Educ. Res.	Final		Scopus	2-s2.0-84891613618
Khan, I. A. (2021). Teaching of pharmacy in saudi arabia: Relevance of english and digital pedagogy. Bahrain Medical Bulletin, 43(3), 618-620. Retrieved from www.scopus.com	Ok	Khan I.A.	Saudi	Students and Teachers	Healthcare	questionnaire and interviews	Mixed	To explore the issues related to teaching of pharmacy and specific English, to investigate into the relevance of technology integration as blended learning strategy, and to explore feasibility of appropriate teaching material.	including of technology	English language is the medium of instruction for higher education in general and medical/paramedical education in particular. Knowledge of English as the medium becomes more crucial when the target learners do not use it as a lingua franca. Therefore, a suitable English curriculum, a blend of appropriate content, technology integration and digital pedagogy may yield far better results in the giv…		57297693500;	Teaching of pharmacy in Saudi Arabia: Relevance of english and digital pedagogy	2021	Bahrain Medical Bulletin	43	3		618	620			https://www.scopus.com/inward/record.uri?eid=2-s2.0-85117161752&partnerID=40&md5=e2f5e266c6826478d2fdf2b27a5c2cb0	Faculty of Applied Studies, King Abdulaziz University, Saudi Arabia	Khan, I.A., Faculty of Applied Studies, King Abdulaziz University, Saudi Arabia	Background: Medical education has always been of great importance for a nation. Teaching of pharmacy and related disciplines pose great problems at most of the colleges due to different pedagogic and linguistic reasons. Objectives: To explore the issues related to teaching of pharmacy and specific English, to investigate into the relevance of technology integration as blended learning strategy, a…	Blended learning; Pharmacy teaching; Strategy; Teaching material	adult; article; curriculum; English (language); feasibility study; female; human; human experiment; learning; male; medical education; pedagogics; pharmacy student; questionnaire; Saudi Arabia; teacher; tertiary education	King Abdulaziz University, KAU: 155-156-1441; Deanship of Scientific Research, King Saud University	This project was funded by the Deanship of Scientific Research (DSR), King Abdulaziz University, Jeddah, under grant no. G: 155-156-1441. The author, therefore, acknowledges with thanks DSR technical and financial support.		Khan, I.A.; Faculty of Applied Studies, Saudi Arabia; email: dr.intakhab@yahoo.com	Bahrain Medical Bulletin	10128298	BMBUE		English	Bahrain Med. Bull.	Final		Scopus	2-s2.0-85117161752
Kumar, M., Saxena, I., Kumar, J., Kumar, G., & Kapoor, S. (2015). Assessment of lecture strategy with different teaching aids. Journal of Clinical and Diagnostic Research, 9(1), CC01-CC05. doi:10.7860/JCDR/2015/10805.5413	Ok	Kumar M., Saxena I., Kumar J., Kumar G., Kapoor S.	india	Students and Teachers	Healthcare	Two questionnaire: teachers and students and interviews	Mixed	Medical/dental colleges in Northern India cater to students with diverse backgrounds, mother tongues, levels of comprehending English, and intelligence levels. This study was conducted to identify lecture strategy and teaching aid best suited for North Indian dental and medical students. It was conducted in two parts – 1. Survey of teachers’ and students’ opinion to obtain their preferences in te…	teaching aids	Survey results indicated that although 97.6% students believed they had good/fair proficiency in English, 83.6% preferred being taught in a combination of English and Hindi; 44.3% students preferred C&B, 40.1% preferred PPT and 15.6% preferred the use of OHP as TA. After conducting a trial lecture with different TAs with each group, more than 90% students expressed satisfaction with the TA used f…	The needs of students in India are different from those of their Western counterparts, and should be considered during didactic lectures to improve the students’ understanding. Post-test results were better when C&B was used, as more students were attentive and/or took notes	57713788800;56418754400;57214276741;57205862477;37028688200;	Assessment of lecture strategy with different teaching aids	2015	Journal of Clinical and Diagnostic Research	9	1		CC01	CC05	8	10.7860/JCDR/2015/10805.5413	https://www.scopus.com/inward/record.uri?eid=2-s2.0-84937543863&doi=10.7860%2fJCDR%2f2015%2f10805.5413&partnerID=40&md5=ae890b5e3fb49a8c2ef03710ded7f970	Department of Physiology, Teerthankar Mahaveer Medical College and Research Center, Moradabad, Uttar Pradesh, India; Deparment of Biochemistry, Aiims JodhpurRajasthan, India; Department of Biochemistry, Teerthankar Mahaveer Medical College and Research Center, Moradabad, Uttar Pradesh, India	Kumar, M., Department of Physiology, Teerthankar Mahaveer Medical College and Research Center, Moradabad, Uttar Pradesh, India; Saxena, I., Deparment of Biochemistry, Aiims JodhpurRajasthan, India; Kumar, J., Department of Physiology, Teerthankar Mahaveer Medical College and Research Center, Moradabad, Uttar Pradesh, India; Kumar, G., Department of Physiology, Teerthankar Mahaveer Medical College…	Background and Objectives: Medical/dental colleges in Northern India cater to students with diverse backgrounds, mother tongues, levels of comprehending English, and intelligence levels. This study was conducted to identify lecture strategy and teaching aid best suited for North Indian dental and medical students. It was conducted in two parts – 1. Survey of teachers’ and students’ opinion to obt…	Chalk and board; Medical education; North Indian medical/ dental colleges; Overhead projector; Power point	adolescent; adult; analysis of variance; Article; comparative study; dental student; female; human; learning; male; medical education; medical student; multiple choice test; observational study; performance; questionnaire; scoring system; student satisfaction; teaching; young adult				Saxena, I.; Department of Biochemistry, All India Institute of Medical SciencesIndia	Journal of Clinical and Diagnostic Research	2249782X			English	J. Clin. Diagn. Res.	Final	All Open Access, Gold, Green	Scopus	2-s2.0-84937543863
Law, K. M. -., Te, V., & Hill, P. S. (2019). Cambodia's health professionals and the ASEAN mutual recognition arrangements: Registration, education and mobility. Human Resources for Health, 17(1) doi:10.1186/s12960-019-0349-5	Ok	Law K.M.-H., Te V., Hill P.S.	Cambodia	Medical educators and policymakers	Healthcare	documentary and policy review with key informant interviews with 16 representatives of agencies	Qualitative	the Association of South East Asian Nations (ASEAN) has been developing Mutual Recognition Arrangements (MRAs) across key professions, including medicine, dentistry and nursing, that would facilitate the development of an ASEAN Economic Community, with shared regional standards and easier mobility of the workforce. This paper examines the interface between those agreements and the registration, p…	government documents	ambodia is an active participant in the ASEAN MRA processes for doctors, dentists and nurses reporting progress annually. Education of health professionals has been increasingly formalised in the past 25 years, with nursing moving towards a 4-year bachelor degree. The private university sector has substantially increased, with English increasingly used as a language of instruction. Recent legisla…	The Royal Government of Cambodia is committed to the ASEAN MRA process. Developments in registration appear to use regional standards as benchmarks, as do reforms in the education of health professionals, though domestic factors appear to more directly impact on developments. Informal mechanisms facilitate the limited mobility currently occurring, with little formal application of the MRA provisi…	57204096131;57202077528;7402918108;	Cambodia's health professionals and the ASEAN Mutual Recognition Arrangements: Registration, education and mobility	2019	Human Resources for Health	17	1	14			4	10.1186/s12960-019-0349-5	https://www.scopus.com/inward/record.uri?eid=2-s2.0-85062476517&doi=10.1186%2fs12960-019-0349-5&partnerID=40&md5=f5bbe07cf2f7fe28862417aadf9703d3	School of Public Health, University of Queensland, Herston, Brisbane, Australia; Ministry of Health, National Institute of Public Health, Phnom Penh, Cambodia	Law, K.M.-H., School of Public Health, University of Queensland, Herston, Brisbane, Australia; Te, V., School of Public Health, University of Queensland, Herston, Brisbane, Australia, Ministry of Health, National Institute of Public Health, Phnom Penh, Cambodia; Hill, P.S., School of Public Health, University of Queensland, Herston, Brisbane, Australia	Background: From 2006, the Association of South East Asian Nations (ASEAN) has been developing Mutual Recognition Arrangements (MRAs) across key professions, including medicine, dentistry and nursing, that would facilitate the development of an ASEAN Economic Community, with shared regional standards and easier mobility of the workforce. This paper examines the interface between those agreements …	ASEAN; Cambodia; Dentists; Doctors; Human resources; Midwifery; Mobility; Mutual Recognition Arrangements; Nurses; Registration	Cambodia; clinical competence; continuing education; cooperation; education; female; foreign worker; government; health care personnel; health care policy; health care quality; human; international cooperation; licensing; management; midwife; organization; pregnancy; questionnaire; register; Southeast Asia; vocational education; workplace; Asia, Southeastern; Cambodia; Clinical Competence; Cooper…	World Health Organization, WHO	The research was funded by the Asia Pacific Observatory of the World Health Organization.		Hill, P.S.; School of Public Health, Australia; email: peter.hill@sph.uq.edu.au	BioMed Central Ltd.	14784491		30808347	English	Hum. Resour. Health	Final	All Open Access, Gold, Green	Scopus	2-s2.0-85062476517
Lazer-Pankiv, O., & Pysmenna, I. (2021). Peculiarities of phonetic and orthographic adaptation of latin terms in english clinical terminology: On the issue of latin terminological competence formation of foreign medical students. Sustainable Multilingualism, 19(1), 173-202. doi:10.2478/sm-2021-0018	Ok	Lazer-Pankiv O., Pysmenna I.	Ukraine	About 8,000 of the most common clinical terms selected from various lexicographic English sources have been studied on the basis of etymological and comparative approaches to demonstrate the grade of inconsistency in the reflection of Latin terms in modern English medical terminology	Healthcare	Text Analysis (vocabulary)	Quantitative	The article deals with the phonetic and orthographic adaptation of Latin terms in English clinical terminology in the context of Latin terminological competence formation of foreign medical students with English as the language of instruction.	text analysis	The quantitative analysis allowed us to determine and classify the main tendencies in the process of phonetic and orthographic development of Latin terms: (1) imitation of classical Latin spelling; (2) ‘simplification’ of classical Latin spelling; (3) syncretism of the first and second tendencies (parallel use of classical Latin and ‘simplified’ variants as synonyms). The analysis has also identi…	The proposed solution is to develop and implement some unified criteria for phonetic and orthographic adaptation of Latin terms in English. The possible ways to solve the problem are either to adhere to the etymological principle, returning ad fontes of medical terminology, and to use only non-monophthongized and nonsimplified forms or to use monophthongized and phonetically and graphically simpl…	57290526300;57357464700;	Peculiarities of Phonetic and Orthographic Adaptation of Latin Terms in English Clinical Terminology: On the Issue of Latin Terminological Competence Formation of Foreign Medical Students	2021	Sustainable Multilingualism	19	1		173	202	1	10.2478/sm-2021-0018	https://www.scopus.com/inward/record.uri?eid=2-s2.0-85120316133&doi=10.2478%2fsm-2021-0018&partnerID=40&md5=1336cfc30c82abbe66877398341cbd78	Taras Shevchenko National University of Kyiv, Ukraine	Lazer-Pankiv, O., Taras Shevchenko National University of Kyiv, Ukraine; Pysmenna, I., Taras Shevchenko National University of Kyiv, Ukraine	The article deals with the phonetic and orthographic adaptation of Latin terms in English clinical terminology in the context of Latin terminological competence formation of foreign medical students with English as the language of instruction. About 8,000 of the most common clinical terms selected from various lexicographic English sources have been studied on the basis of etymological and compar…	clinical terminology; Latin language; phonetic and orthographic development of Latin terms; terminological competence						Sciendo	23352019			English	Sustain. Multiling.	Final	All Open Access, Gold	Scopus	2-s2.0-85120316133
Mann, C., Canny, B. J., Reser, D. H., & Rajan, R. (2013). Poorer verbal working memory for a second language selectively impacts academic achievement in university medical students. PeerJ, 2013(1) doi:10.7717/peerj.22	Ok	Mann C., Canny B.J., Reser D.H., Rajan R.	Australia	Students	Healthcare	two questionnaires and Audiometry testing	Quantitative	Working memory (WM) is often poorer for a second language (L2). In low noise conditions, people listening to a language other than their first language (L1) may have similar auditory perception skills for that L2 as native listeners, but do worse in high noise conditions, and this has been attributed to the poorer WM for L2. Given that WM is critical for academic success in children and young adu…	comperhension	Significant diVerences in Speech-Noise Ratio (SNR50) values were observed between medical undergraduates who had learned English before or after five years of age, with the latter group doing worse in the ability to extract whole connected speech in the presence of background multi-talker babble (Student-t tests, p < 0:001). Significant negative correlations were observed between the SNR50 and se…	In summary, our study contributes to the growing research examining why non-native medical undergraduates generally perform academically worse than their native speaker counterparts despite having good L2 proficiency skills. The implications are that in a prestigious course such as the MBBS degree, where all students have proven high academic abilities, motivation and expectations prior to commen…	24278712900;7006441516;6602330400;55737299900;	Poorer verbal working memory for a second language selectively impacts academic achievement in university medical students	2013	PeerJ	2013	1	e22			11	10.7717/peerj.22	https://www.scopus.com/inward/record.uri?eid=2-s2.0-84877143712&doi=10.7717%2fpeerj.22&partnerID=40&md5=29635840d813411cb7e30a898e5f85d3	Department of Physiology, Faculty of Medicine Nursing and Health Sciences, Monash University, Clayton, VIC, Australia	Mann, C., Department of Physiology, Faculty of Medicine Nursing and Health Sciences, Monash University, Clayton, VIC, Australia; Canny, B.J., Department of Physiology, Faculty of Medicine Nursing and Health Sciences, Monash University, Clayton, VIC, Australia; Reser, D.H., Department of Physiology, Faculty of Medicine Nursing and Health Sciences, Monash University, Clayton, VIC, Australia; Rajan,…	Working memory (WM) is often poorer for a second language (L2). In low noise conditions, people listening to a language other than their first language (L1) may have similar auditory perception skills for that L2 as native listeners, but do worse in high noise conditions, and this has been attributed to the poorer WM for L2. Given that WM is critical for academic success in children and young adu…	Assessment; English as a second language; International students,Working memory; Medical education; OSCE; Speech in noise	academic achievement; adult; aptitude test; article; child; communication skill; education program; English as a second language; female; human; human experiment; infant; language; learning style; male; medical assessment; medical student; Perceived Stress Scale; questionnaire; signal noise ratio; sound pressure; speech audiometry; speech discrimination; undergraduate student; verbal memory; work…				Mann, C.; Department of Physiology, , Clayton, VIC, Australia; email: Collette.Mann@med.monash.edu.au		21678359			English	PeerJ	Final	All Open Access, Gold, Green	Scopus	2-s2.0-84877143712
Matthews, M., & Van Wyk, J. (2016). Speaking the language of the patient: Indigenous language policy and practice. South African Family Practice, 58(1), 30-31. doi:10.1080/20786190.2015.1083718	Ok	Matthews M., Van Wyk J.	South Africa	Students	Healthcare	questionnaire and interviews	Mixed	This mixed-method study assessed the knowledge, attitudes and perceptions of third-year students who had received isiZulu-training during their first year at the University of KwaZulu-Natal.	knowledge, attitudes and perceptions students	The results indicated an improvement in students’ communicative competence. In general, positive attitudes were held by the students towards the language, but there was a perceived need for additional input in order for the students to become competent.	Although the results showed an improvement in the knowledge and positive attitudes of learners with respect to learning isiZulu, the benefits gained did not translate into their practical ability to communicate with patients. In response to this need, efforts are being made to improve language learning by emphasising communicative language teaching methods in the first year of study	57198437063;14027546900;	Speaking the language of the patient: Indigenous language policy and practice	2016	South African Family Practice	58	1		30	31	2	10.1080/20786190.2015.1083718	https://www.scopus.com/inward/record.uri?eid=2-s2.0-84963737106&doi=10.1080%2f20786190.2015.1083718&partnerID=40&md5=495aa471f9bc825127299fb9c57e0788	University Language Board, Nelson R Mandela School of Medicine, University of KwaZulu-Natal, Durban, South Africa; Clinical and Pedagogical Education, Nelson R Mandela School of Medicine, University of KwaZulu-Natal, Durban, South Africa	Matthews, M., University Language Board, Nelson R Mandela School of Medicine, University of KwaZulu-Natal, Durban, South Africa; Van Wyk, J., Clinical and Pedagogical Education, Nelson R Mandela School of Medicine, University of KwaZulu-Natal, Durban, South Africa	South Africa faces numerous challenges in healthcare, with the result that communities in many rural provinces are grossly underserved. These problems are compounded when doctors are unable to communicate with their patients. IsiZulu is spoken by most people in KwaZulu-Natal. Older and rural patients often present as monolingual isiZulu speakers. The need and ability to speak an indigenous langua…	Communication; IsiZulu; Language; Policy; Practice; Rural patients	doctor patient relation; human; human experiment; language; perception; speech; university				Matthews, M.; University Language Board, South Africa	Medpharm Publications	20786190			English	S. Afr. Fam. Pract.	Final	All Open Access, Hybrid Gold	Scopus	2-s2.0-84963737106
Mayberry, J. F. (2016). Doctors qualified from chinese universities with "english parallel" courses registered with the general medical council. [El registro de los titulados de universidades chinas, con cursos de «Inglés Paralelo» con el Colegio de Médicos] Educacion Medica, 17(1), 16-19. doi:10.1016/j.edumed.2016.02.002	Ok	Mayberry J.F.	UK & China	medical practitioners graduated from china and wok in UK	Healthcare	text analysis Freedom of Information (F14/6537) request the General Medical Council and students' blogs	Mixed	To identify the number of Chinese graduates from medical schools in China with an English Parallel course through a Freedom of Information search of the current UK medical register.		Details of 73 graduates were obtained. Twenty one of the registrants were Chinese and 52 South Asian. During the last decade there has been a significant increase in the number of Pakistani and Indian graduates who have registered with the GMC compared to Chinese graduates	If the experience with Central and Eastern European ‘‘English Parallel’’ courses is repeated we should expect a significant growth in the numbers of British and EU citizens training and graduating in China and subsequently practicing in the UK	55230860100;	Doctors qualified from Chinese Universities with "English Parallel" courses registered with the General Medical Council [El registro de los titulados de universidades chinas, con cursos de «Inglés Paralelo» con el Colegio de Médicos]	2016	Educacion Medica	17	1		16	19		10.1016/j.edumed.2016.02.002	https://www.scopus.com/inward/record.uri?eid=2-s2.0-84962076946&doi=10.1016%2fj.edumed.2016.02.002&partnerID=40&md5=354cc524a6824dffc266d41bb8aa3db2	Department of Digestive Diseases, University Hospitals of Leicester NHS Trust, Gwendolen Road, Leicester, LE5 4PW, United Kingdom	Mayberry, J.F., Department of Digestive Diseases, University Hospitals of Leicester NHS Trust, Gwendolen Road, Leicester, LE5 4PW, United Kingdom	Objective: To identify the number of Chinese graduates from medical schools in China with an English Parallel course through a Freedom of Information search of the current UK medical register. Method: A Freedom of Information request was submitted to the General Medical Council to investigate the number of graduates from Chinese medical schools with MB BS courses using English as the medium of in…	Citizenship; Medicine; Registration; Students; UK					Mayberry, J.F.; Department of Digestive Diseases, Gwendolen Road, United Kingdom; email: john.mayberry@uhl-tr.nhs.uk	Fundacion Educacion Medica	15751813			English	Educ. Med.	Final	All Open Access, Gold, Green	Scopus	2-s2.0-84962076946
Møller, H. (2013). "Double culturedness": The "capital" of inuit nurses. International Journal of Circumpolar Health, 72(SUPPL.1) doi:10.3402/ijch.v72i0.21266	Ok	Møller H.	nunavut and Greenland	Students	Healthcare	interviews and questionnaires, observation, participant observation and reviews of news reports, government documents and reports	Qualitative	This paper discusses the experiences of Inuit who are educated in nursing programmes and practise in healthcare systems located in the Arctic but dominated by EuroCanadian and Danish culture and language	experiences of nursing students	Participants experienced degrees of success and well-being in the educational systems that are afforded to few other Canadian and Greenlandic Inuit. This success appeared to be based on nurses and students possessing, or having acquired, what I call ‘‘double culturedness’’; this makes them able to communicate in at least 2 languages and cultures, including the ability to understand, negotiate and…	There continues to be a critical need for Inuit nurses with their special knowledge and abilities in the healthcare systems of the Arctic. Inuit nurses’ experiences will help inform the education and healthcare systems and point to areas in need of support and change in order to increase recruitment and retention of nursing students and practitioners.	23474703900;	"Double culturedness": The "capital" of Inuit nurses	2013	International Journal of Circumpolar Health	72	SUPPL.1	21266			9	10.3402/ijch.v72i0.21266	https://www.scopus.com/inward/record.uri?eid=2-s2.0-84881276580&doi=10.3402%2fijch.v72i0.21266&partnerID=40&md5=f3e3f937d98b1f2e1dec42946dd9011f	Department of Health Sciences, Lakehead University, Thunder Bay, Canada	Møller, H., Department of Health Sciences, Lakehead University, Thunder Bay, Canada	Background. The health and educational systems in Greenland and Nunavut are reflections of those in Denmark and Southern Canada, with the language of instruction and practise being Danish and English. This places specific demands on Inuit studying nursing. Objective. This paper discusses the experiences of Inuit who are educated in nursing programmes and practise in healthcare systems located in …	Capital; Greenland; Habitus; Nunavut; Nursing; Nursing education	Arctic; article; Canada; capital; cultural anthropology; ethnology; Greenland; habitus; human; interview; Inuit; language; nurse; nursing; nursing education; questionnaire; capital; Greenland; habitus; Nunavut; nursing; nursing education; Arctic Regions; Culture; Education, Nursing; Greenland; Humans; Interviews as Topic; Inuits; Language; Nunavut; Nurses; Questionnaires				Møller, H.; Department of Health Sciences, 955 Oliver Rd, Thunder Bay ON, P7A 5E1, Canada; email: hmoeller@lakeheadu.ca		12399736		23986889	English	Int. J. Circumpolar Health	Final	All Open Access, Gold, Green	Scopus	2-s2.0-84881276580
Mustonen, S., & Strömmer, M. (2022). Becoming a multilingual health professional in vocational education - two adult migrants’ translanguaging trajectories. Journal of Multilingual and Multicultural Development, doi:10.1080/01434632.2022.2116451	Ok	Mustonen S., Strömmer M.	Finland	Students	Healthcare	ethnographic observations, interviews, and audio-recorded interaction	Qualitative	The number of migrant students in vocational education in Finland is rising. Their educational backgrounds and language resources are diverse, and research is needed to gain better understanding on how their existing knowledge can be acknowledged, supported, and deployed when they become multilingual professionals in their own fields. In this ethnographic study, we drew on the theoretical approac…	previous knoweldge	The analysis illustrates how translanguaging not only deepens multilingual students’ understanding of field-specific content but also enables them to strategically use and strengthen their multilingual resources	he value attributed to translanguaging is also impacted by hierarchical structures.	57217909764;57191473717;	Becoming a multilingual health professional in vocational education - two adult migrants’ translanguaging trajectories	2022	Journal of Multilingual and Multicultural Development							10.1080/01434632.2022.2116451	https://www.scopus.com/inward/record.uri?eid=2-s2.0-85137782147&doi=10.1080%2f01434632.2022.2116451&partnerID=40&md5=31357c30d3095bd0352ac05ecccccdbb	Department of Teacher Education, University of Jyväskylä, Jyväskylä, Finland; Department of Language and Communication Studies, University of Jyväskylä, Jyväskylä, Finland	Mustonen, S., Department of Teacher Education, University of Jyväskylä, Jyväskylä, Finland; Strömmer, M., Department of Language and Communication Studies, University of Jyväskylä, Jyväskylä, Finland	The number of migrant students in vocational education in Finland is rising. Their educational backgrounds and language resources are diverse, and research is needed to gain better understanding on how their existing knowledge can be acknowledged, supported, and deployed when they become multilingual professionals in their own fields. In this ethnographic study, we drew on the theoretical approac…	adult education; health care; language architecture; Translanguaging; translanguaging trajectory; vocational education		Academy of Finland, AKA	This study forms part of an interdisciplinary project Building Blocks – Developing Second Language Resources for Working Life, funded by the Academy of Finland (2019–2023), targeted at exploring the language resources needed and developed by adult immigrants whose aim is to enter the Finnish labour market. To obtain rich data on these issues in vocational education, we applied team ethnography (B…		Mustonen, S.; Department of Teacher Education, PO Box 35, Finland; email: sanna.s.mustonen@jyu.fi	Routledge	1434632			English	J. Multiling. Multicult. Dev.	Article in Press	All Open Access, Hybrid Gold	Scopus	2-s2.0-85137782147
Ndawo, G. (2019). The influence of language of instruction in the facilitation of academic activities: Nurse educators’ experiences. Health SA Gesondheid, 24 doi:10.4102/hsag.v24i0.1261	OK	Ndawo G.	South Africa	Students	Healthcare	interviews	Qualitative	The purpose of this article was to describe the experiences of nurse educators teaching in a 4-year comprehensive nursing diploma programme regarding the use of English as the LOI during academic activities.	experiences	It emerged that English language incompetence (1) undermines learners’ self-esteem; (2) hinders critical, reflective and creative thinking; (3) renders understanding difficult and that (4) nurse educators’ incompetence in LOI hinders meaningful teaching.	Recommendations were made to improve the use of the LOI because through language interdisciplinary knowledge and understanding are integrated, thus ultimately providing patients with comprehensive, holistic and transcultural healthcare.	57211291039;	The influence of language of instruction in the facilitation of academic activities: Nurse educators’ experiences	2019	Health SA Gesondheid	24		a1261			1	10.4102/hsag.v24i0.1261	https://www.scopus.com/inward/record.uri?eid=2-s2.0-85073378039&doi=10.4102%2fhsag.v24i0.1261&partnerID=40&md5=a11dd99d3ec0338fbbd0e8e6adc3f406	Department of Nursing, Faculty of Health Sciences, University of Johannesburg, Johannesburg, South Africa	Ndawo, G., Department of Nursing, Faculty of Health Sciences, University of Johannesburg, Johannesburg, South Africa	Background: Learners in most South African higher education institutions are taught mainly through English for most of their academic lives, yet many of them enter these institutions with poor proficiency in this language of instruction (LOI). Aims: The purpose of this article was to describe the experiences of nurse educators teaching in a 4-year comprehensive nursing diploma programme regarding…	Academic activities; Experiences; Language of instruction (LOI); LOI incompetence; Nurse educator; Proficiency	adult; article; creativity; data analysis; English (language); facilitation; human; interview; midwife; nurse; nursing science; self esteem; South Africa; teaching; transcultural care				Ndawo, G.; Department of Nursing, South Africa; email: gugun@uj.ac.za	AOSIS OpenJournals Publishing AOSIS (Pty) Ltd	10259848			English	Health SA Gesondheid	Final	All Open Access, Gold, Green	Scopus	2-s2.0-85073378039
Otomo, R. (2022). The discourse of self-learning: An analysis of Japan’s EPA programme for healthcare workers from southeast asia. Asian Studies Review, 46(4), 597-616. doi:10.1080/10357823.2022.2069675	ok	Otomo R.	Japan	Analysis of text	Healthcare	text analysis policy government	Qualitative	Applicants are required to complete one year of Japanese language training prior to working at the host institutions, and are expected to sit the Japanese-language healthcare licensure examination within three to four years of their arrival in Japan. This article examines the policy discourse of language learning practices and environments, which are important parameters for ensuring participants…	policy discourse of language learning practices and environments	The major finding is that the excessive promotion of self-learning among migrant workers correlates with a lower level of support from host institutions for their language learning. I argue that the Japanese government has shifted the responsibility for resultant negative consequences – such as the institutional burden of on-the-job training and the low exam pass rate – to the migrant workers by …	y research confronts unavoidable limitations because I am analysing policy texts about self-learning without having access to the actual self-learning materials	57191916407;	New Form of National Language Policy? The Case of the Economic Partnership Agreement (EPA) in Japan	2016	Asia-Pacific Education Researcher	25	05-Jun		735	742	9	10.1007/s40299-016-0306-1	https://www.scopus.com/inward/record.uri?eid=2-s2.0-84994707458&doi=10.1007%2fs40299-016-0306-1&partnerID=40&md5=c88c817180fb1e99c02c33b8b99dc9e3	Faculty of Education, The University of Hong Kong, Room 668, Meng Wah Complex, Pokfulam, Hong Kong	Otomo, R., Faculty of Education, The University of Hong Kong, Room 668, Meng Wah Complex, Pokfulam, Hong Kong	Language policies in Japan have been mainly discussed in the context of national provisions and regulations regarding the Japanese language, or foreign language education. This paper examines the possible emergence of a new national language policy, embedded in a bilateral economic partnership agreement (EPA) signed between Japan and Southeast Asian countries. Besides its economic orientation, th…	Aging society; Healthcare workforce; International migration; Japan; The Economic Partnership Agreements					Otomo, R.; Faculty of Education, Room 668, Meng Wah Complex, Hong Kong; email: rotomo@connect.hku.hk	Springer Singapore	1195646			English	Asia Pac. Educ. Res.	Final		Scopus	2-s2.0-84994707458
Pomat, N., Jannok, A., Buripakdi, A., & Wilang, J. D. (2022). Partial EMI nursing program: Insights from students and teachers in thailand. Theory and Practice in Language Studies, 12(7), 1386-1396. doi:10.17507/tpls.1207.19	Ok	Pomat N., Jannok A., Buripakdi A., Wilang J.D.	Thailand	Students and Teachers	Healthcare	focus group and interviews	Qualitative	The adoption of English as a medium of instruction (EMI) in Thailand is not without difficulties. In this study, the needs and challenges of nursing students and teachers were explored qualitatively in a program where courses are allowed to be taught fully in English, fully in Thai or both in Thai and English.	challenges Thailand is not without difficulties. In this study, the needs and challenges	Insights from students revealed the importance of English toward their career goals, their needs and challenges related to EMI (i.e., bilingual support system, clarification of technical terms, code-switching instruction), and their coping strategies when the lesson is challenging to comprehend. On the other hand, teachers confirmed the students’ language proficiency problems. In addition, they a…	Not only students feel the need to improve their language skills but also the teachers.	57798585600;57219534648;54994031200;57195297132;	Partial EMI Nursing Program: Insights From Students and Teachers in Thailand	2022	Theory and Practice in Language Studies	12	7		1386	1396		10.17507/tpls.1207.19	https://www.scopus.com/inward/record.uri?eid=2-s2.0-85134037469&doi=10.17507%2ftpls.1207.19&partnerID=40&md5=de80c3a052b1294fd3e5c289a2756758	School of Foreign Languages, Institute of Social Technology, Suranaree University of Technology, Nakhon Ratchasima, Thailand; Graduate School of English Language Studies, Institute of Social Technology, Suranaree University of Technology, Nakhon Ratchasima, Thailand	Pomat, N., School of Foreign Languages, Institute of Social Technology, Suranaree University of Technology, Nakhon Ratchasima, Thailand; Jannok, A., School of Foreign Languages, Institute of Social Technology, Suranaree University of Technology, Nakhon Ratchasima, Thailand; Buripakdi, A., Graduate School of English Language Studies, Institute of Social Technology, Suranaree University of Technolo…	The adoption of English as a medium of instruction (EMI) in Thailand is not without difficulties. In this study, the needs and challenges of nursing students and teachers were explored qualitatively in a program where courses are allowed to be taught fully in English, fully in Thai or both in Thai and English. Focus group interviews for students were conducted, while semi-structured interviews we…	English as a medium of instruction; nursing program; Thailand		Suranaree University of Technology, SUT	The authors would like to acknowledge the research grant provided by the Faculty Development Academy (FDA), Suranaree University of Technology (SUT), Nakhon Ratchasima, Thailand.		Wilang, J.D.; Graduate School of English Language Studies, Thailand; email: wilang@g.sut.ac.th	Academy Publication	17992591			English	Theory Pract. Lang. Stud.	Final	All Open Access, Bronze	Scopus	2-s2.0-85134037469
Pun, J. K. H. (2021). Comparing veterinary students’ and practitioners’ perceptions of communication in a bilingual context. Veterinary Record, 189(12), no. doi:10.1002/vetr.587	ok	Pun J.K.H.	Hong Kong	Students and practitioner	Healthcare	questionnaire and interviews	Mixed	Using veterinary medicine as the clinical context, this case study elicited perspectives of practitioners and students in Hong Kong about the impact of their communication skills on clinical practice.	perspectives of practitioners and students in Hong Kong	The students highlighted that English is the predominant instructional language in their training, although there are evident discrepancies between the curriculum and the clinical setting given the three predominant languages used in Hong Kong. The veterinary medical practitioners also highlighted strategies for clear communication, and the significance of interpersonal skills as effective commun…	This study can offer insights to educators on ways to bridge veterinary training and the clinical setting in bilingual contexts where communication problems result from language differences used for instruction and in clinical settings. Taking cultural context into consideration, multimodal teaching and learning materials can be developed to accommodate students' needs for both academic and profe…	56305768200;	Comparing veterinary students’ and practitioners’ perceptions of communication in a bilingual context	2021	Veterinary Record	189	12		no			10.1002/vetr.587	https://www.scopus.com/inward/record.uri?eid=2-s2.0-85107907300&doi=10.1002%2fvetr.587&partnerID=40&md5=23f44270412e41675f727a3e85d0cb6a	Department of English, The City University of Hong Kong, Hong Kong	Pun, J.K.H., Department of English, The City University of Hong Kong, Hong Kong	Background: Using veterinary medicine as the clinical context, this case study elicited perspectives of practitioners and students in Hong Kong about the impact of their communication skills on clinical practice. Methods: A cross-sectional mixed-method design was adopted. Fifty students from the Bachelor of Veterinary Medicine programme were surveyed about their perspectives on expected communica…	clinical communication strategies; cultural competence; effective communication; outcomes; veterinary	adolescent; adult; Article; bilingualism; communication skill; comparative study; controlled study; cross-sectional study; curriculum development; educational status; empathy; female; health care personnel; health educator; health survey; Hong Kong; human; interpersonal communication; male; medical education; perception; satisfaction; semi structured interview; social interaction; veterinary stud…		The author would like to thank all the participants involved in this study.		Pun, J.K.H.; Department of English, Hong Kong; email: jack.pun@cityu.edu.hk	John Wiley and Sons Inc	424900	VETRA	34132403	English	Vet. Rec.	Final		Scopus	2-s2.0-85107907300
Rodis, O. M. M., Barroga, E., Barron, J. P., Hobbs, J., Jayawardena, J. A., Kageyama, I., . . . Yoshimoto, K. (2015). A proposed core curriculum for dental english education in japan. BMC Medical Education, 14(1) doi:10.1186/s12909-014-0239-4	Ok	Rodis O.M.M., Barroga E., Barron J.P., Hobbs J., Jayawardena J.A., Kageyama I., Kalubi B., Langham C., Matsuka Y., Miyake Y., Seki N., Oka H., Peters M., Shibata Y., Stegaroiu R., Suzuki K., Takahashi S., Tsuchiya H., Yoshida T., Yoshimoto K.	Japan	Students, Teachers, and adminstrators	Healthcare	a survey, two discussion forums, a workshop	Qualitative	Globalization of the professions has become a necessity among schools and universities across the world. It has affected the medical and dental professions in terms of curriculum design and student and patient needs. In Japan, where medicine and dentistry are taught mainly in the Japanese language, profession-based courses in English, known as Medical English and Dental English, have been integra…	core curriculum nor a model syllabus for these courses	The core curriculum covers the theoretical aspects, including dental English terms and oral pathologies; and practical aspects, including blended learning and dentist-patient communication. It is divided into modules and is recommended to be offered for at least two semesters.	The core curriculum is expected to guide curriculum developers in schools where dental English courses are yet to be offered or are still in their early development. It may also serve as a model curriculum to medical and dental schools in countries in Asia, Europe, Africa, and Central and South America, where English is not the medium of instruction.	14919679500;55505688700;12789715900;56720088800;6602643863;9242776700;6507682198;36845356100;7003862097;57640132800;37075655500;26324080600;56720046400;7402035627;6601935244;55503624600;7407712968;7202203371;55871845500;7102096536;	A proposed core curriculum for dental English education in Japan	2015	BMC Medical Education	14	1	239			8	10.1186/s12909-014-0239-4	https://www.scopus.com/inward/record.uri?eid=2-s2.0-84937001274&doi=10.1186%2fs12909-014-0239-4&partnerID=40&md5=2b61bd5cca695a06363c0e7bc810e930	Institute of Health Biosciences Support, Office of Frontier Oral Science, International Exchange and Collaboration, University of Tokushima, Graduate School, 3-18-15 Kuramoto-cho, Tokushima City, 770-8504, Japan; Department of International Medical Communications, Tokyo Medical University, Tokyo, Japan; Department of Foreign Languages, Iwate Medical University, Iwate, Japan; Department of General…	Rodis, O.M.M., Institute of Health Biosciences Support, Office of Frontier Oral Science, International Exchange and Collaboration, University of Tokushima, Graduate School, 3-18-15 Kuramoto-cho, Tokushima City, 770-8504, Japan; Barroga, E., Department of International Medical Communications, Tokyo Medical University, Tokyo, Japan; Barron, J.P., Department of International Medical Communications, …	Background: Globalization of the professions has become a necessity among schools and universities across the world. It has affected the medical and dental professions in terms of curriculum design and student and patient needs. In Japan, where medicine and dentistry are taught mainly in the Japanese language, profession-based courses in English, known as Medical English and Dental English, have …	Core curriculum; Dental English; Harmonized education; Health care english; Japan	cultural factor; curriculum; dental education; dental student; female; human; Japan; language; male; multilingualism; organization; organization and management; statistics and numerical data; Cross-Cultural Comparison; Curriculum; Education, Dental; Female; Humans; Japan; Language; Male; Multilingualism; Organizational Innovation; Schools, Dental; Students, Dental	Japan Society for the Promotion of Science, KAKEN	This work was supported by a grant-in-aid for Scientific Research (C) 23531201 from the Japan Society for the Promotion of Science. The authors wish to thank the staff members of the Academic Affairs Office of each of the 29 dental schools who cooperated with us during the survey. The authors are also grateful to the following individuals for their invaluable contribution and advice in developing…		Rodis, O.M.M.; Institute of Health Biosciences Support, Office of Frontier Oral Science, International Exchange and Collaboration, University of Tokushima, Graduate School, 3-18-15 Kuramoto-cho, Japan	BioMed Central Ltd.	14726920		25404383	English	BMC Med. Educ.	Final	All Open Access, Gold, Green	Scopus	2-s2.0-84937001274
Roshini, K., Philip, J. M., Abraham, H. M., Venkatakrishnan, C. J., & Chandran, C. R. (2018). Language proficiency and perceived drawbacks among undergraduate dental students in a south indian dental college. Drug Invention Today, 10(8), 1487-1489. Retrieved from www.scopus.com	Ok	Roshini K., Philip J.M., Abraham H.M., Venkatakrishnan C.J., Chandran C.R.	india	Students	Healthcare	questionnaire	Quantitative	To investigate whether dental students who were educated in schools in which English was not the only medium of instruction, perceive drawbacks in their education and examination experience because of their language background and lack of language pro ciency. 2) To analyze any change in this perception as the students progress through the undergraduate course	language background	Dental students who were educated in schools in which English was not the only medium of instruction, perceived drawbacks in their education and examination experience because of their language background and lack of language proficiency	Language skills, communication skills and Behavioral science must be an integral part of dental education to ease the transition from school to dental college.	57160282200;55313174200;57189367887;56705384200;56394322000;	Language proficiency and perceived drawbacks among undergraduate dental students in a south Indian dental college	2018	Drug Invention Today	10	8		1487	1489			https://www.scopus.com/inward/record.uri?eid=2-s2.0-85050374337&partnerID=40&md5=469a6df580e2f962e69419a27f762929	Department of Prosthodontics, Tagore Dental College, Near Vandalur, Chennai, Tamil Nadu, India; Department of Prosthodontics, Tagore Dental College, Near Vandalur, Melakkottaiyur, Rathinamangalam, Tamil Nadu, India; Department of Periodontics, Tagore Dental College, Chennai, Tamil Nadu, India	Roshini, K., Department of Prosthodontics, Tagore Dental College, Near Vandalur, Chennai, Tamil Nadu, India; Philip, J.M., Department of Prosthodontics, Tagore Dental College, Near Vandalur, Melakkottaiyur, Rathinamangalam, Tamil Nadu, India; Abraham, H.M., Department of Prosthodontics, Tagore Dental College, Near Vandalur, Chennai, Tamil Nadu, India; Venkatakrishnan, C.J., Department of Prosthod…	Aim: The aim of this study was to investigate whether dental students perceive drawbacks in their education and examination experience because of their lack of language proficiency. Materials and Methods: A cross-sectional study was carried. Two hundred undergraduate dental students in a South Indian dental college (n = 200) were asked to complete a questionnaire comprising 12 questions related t…	Communication skills; Dental education; Language proficiency	article; behavioral science; communication skill; cross-sectional study; dental education; dental student; education; human; human experiment; language; major clinical study; questionnaire; tooth				Philip, J.M.; Department of Dental Sciences, 173, New Agaram Road, India; email: jacobmphilip@gmail.com	JPR Solutions	9757619			English	Drug Invent. Today	Final		Scopus	2-s2.0-85050374337
Saha, S., Koley, M., Ghosh, A., Mondal, R., Arya, J. S., & Choubey, G. (2013). A survey on perception of homoeopathic undergraduate students towards learning environment in an indian scenario. International Journal of High Dilution Research, 12(43), 62-76. Retrieved from www.scopus.com	Ok	Saha S., Koley M., Ghosh A., Mondal R., Arya J.S., Choubey G.	india	Students	Healthcare	questionnaire	Quantitative	This research was an attempt to understand the views of students of homoeopathic undergraduate schools in West Bengal, India and to identify areas of strength and weakness in the learning environment.		The questionnaire generated seven subscales – flexibility, student to student interaction, emotional climate, supportiveness, meaningful experience, organization, and breadth of interest. 46.5% students belonged to rural areas and Bengali was the mother tongue of 93.7% students. 39.5% preferred Bengali as the medium of instruction	This study emphasized the areas requiring improvement in homoeopathic school environment based on students’ perspective. Changes in curriculum, faculty and infrastructure should be planned to improve students’ satisfaction	55615841200;55616300500;55823773600;55823775500;55823131900;55823230900;	A survey on perception of homoeopathic undergraduate students towards learning environment in an Indian scenario	2013	International Journal of High Dilution Research	12	43		62	76	2		https://www.scopus.com/inward/record.uri?eid=2-s2.0-84881655172&partnerID=40&md5=2874af9fb1ca7974369ebbcba1683896	Clinical Research Unit (Homeopathy), Under CCRH, Govt. of India, Siliguri, India; Midnapore Homeopathic Medical College and Hospital, Govt. of West Bengal, India; Mahesh Bhattacharyya Homeopathic Medical College and Hospital, Govt. of West Bengal, India	Saha, S., Clinical Research Unit (Homeopathy), Under CCRH, Govt. of India, Siliguri, India; Koley, M., Clinical Research Unit (Homeopathy), Under CCRH, Govt. of India, Siliguri, India; Ghosh, A., Midnapore Homeopathic Medical College and Hospital, Govt. of West Bengal, India; Mondal, R., Mahesh Bhattacharyya Homeopathic Medical College and Hospital, Govt. of West Bengal, India; Arya, J.S., Clinic…	This research was an attempt to understand the views of students of homoeopathic undergraduate schools in West Bengal, India and to identify areas of strength and weakness in the learning environment. An institutional, cross-sectional, observational study was carried out involving 430 students in May, 2013 in two Government homoeopathic medical colleges in West Bengal, India. A seven-item close-e…	Education; Environment; Homeopathy; Learning; Questionnaire; Students					Saha, S.; Clinical Research Unit (Homeopathy), Under CCRH, , Siliguri, India; email: drsubhranilsaha@hotmail.com		19826206			English	Int. J. High Dilution Res.	Final		Scopus	2-s2.0-84881655172
Salamonson, Y., Glew, P. J., Ramjan, L. M., Jefferies, D., Maneze, D., Crook, B., & Everett, B. (2021). Psychometric evaluation of the 11-item english language usage scale in commencing nursing students. Nurse Education Today, 96 doi:10.1016/j.nedt.2020.104599	Ok	Salamonson Y., Glew P.J., Ramjan L.M., Jefferies D., Maneze D., Crook B., Everett B.	Australia	Students	Healthcare	questionnaire and test	Quantitative	Globalisation has increased the number of students from culturally and linguistically diverse backgrounds enrolling in nursing programs where English is the primary medium of instruction. These students may experience challenges with English language usage and need to be identified early to ensure academic success. Objective: To develop and test the psychometric properties of a self-report Englis…		Of the 1723 students enrolled, 1100 (64%) returned surveys with all items of the ELUS-11 completed. The mean age of respondents was 25.4 years (SD: 8.0 years), 85% were female and 67% spoke a language other than English at home. Exploratory factor analysis yielded a one-factor structure that explained 65% of the variance, with factor loadings ranging from 0.72 to 0.86; and high internal consisten…	The ELUS-11 is a valid and reliable measure of English-language usage, and appropriate for use in an undergraduate nursing population to identify students at risk of poor academic performance	6508079469;55195028600;6508264563;36518695600;24734236100;57219530056;13606248400;	Psychometric evaluation of the 11-item English language usage scale in commencing nursing students	2021	Nurse Education Today	96		104599				10.1016/j.nedt.2020.104599	https://www.scopus.com/inward/record.uri?eid=2-s2.0-85093649359&doi=10.1016%2fj.nedt.2020.104599&partnerID=40&md5=3165da293016f4956dc7ebca379eb31c	Western Sydney University, School of Nursing and Midwifery, Centre for Oral Health Outcomes and Research Translation (COHORT), Ingham Institute for Applied Medical Research, Locked Bag 1797, Penrith, NSW 2751, Australia; Western Sydney University, School of Nursing and Midwifery, Centre for Applied Nursing Research (CANR), Ingham Institute for Applied Medical Research, Locked Bag 1797, Penrith, N…	Salamonson, Y., Western Sydney University, School of Nursing and Midwifery, Centre for Oral Health Outcomes and Research Translation (COHORT), Ingham Institute for Applied Medical Research, Locked Bag 1797, Penrith, NSW 2751, Australia; Glew, P.J., Western Sydney University, School of Nursing and Midwifery, Centre for Applied Nursing Research (CANR), Ingham Institute for Applied Medical Research,…	Background: Globalisation has increased the number of students from culturally and linguistically diverse backgrounds enrolling in nursing programs where English is the primary medium of instruction. These students may experience challenges with English language usage and need to be identified early to ensure academic success. Objective: To develop and test the psychometric properties of a self-r…	Academic performance; English language usage; Instrument development; Nursing student; Psychometrics	academic achievement; adult; article; Australia; confirmatory factor analysis; controlled study; correlational study; English (language); exploratory factor analysis; female; human; human experiment; internal consistency; Likert scale; major clinical study; male; nursing student; predictive validity; prospective study; psychometry; self report				Salamonson, Y.; Western Sydney University, Locked Bag 1797, Australia; email: y.salamonson@westernsydney.edu.au	Churchill Livingstone	2606917		33099090	English	Nurse Educ. Today	Final		Scopus	2-s2.0-85093649359
Seabi, J., Seedat, J., Khoza-Shangase, K., & Sullivan, L. (2014). Experiences of university students regarding transformation in south africa. International Journal of Educational Management, 28(1), 66-81. doi:10.1108/IJEM-01-2012-0017	Ok	Seabi J., Seedat J., Khoza-Shangase K., Sullivan L.	South Africa	Students	psychology, social work and speech audiology and pathology	questionnaire	Mixed	The purpose of this paper is to investigate students’ perceptions of the challenges that they face and the factors that facilitate and impede teaching and learning within the context of transformation at the University of the Witwatersrand. The paper also explores students’ perceptions of transformation directly and their ideas related to facilitating this process. The authors reflect briefly on …		The results revealed positive facilitative factors such as quality of teaching, social support, material resources and practical/clinical training; as well as negative hindering factors that included high workload, English as a medium of instruction and limited access to “other” resources which impacted the learning processes. There was a general feeling of dissatisfaction with the current status…	This study makes novel contributions to the literature, especially related to the South African context. For instance, white students in professional degree programs reported that their inability to speak indigenous African languages hindered their provision of services to clients. This finding contrasts with previous literature that suggests that students who speak English as a first language ha…	26323334200;52364989200;36005211600;37082047800;	Experiences of university students regarding transformation in South Africa	2014	International Journal of Educational Management	28	1		66	81	17	10.1108/IJEM-01-2012-0017	https://www.scopus.com/inward/record.uri?eid=2-s2.0-84890869883&doi=10.1108%2fIJEM-01-2012-0017&partnerID=40&md5=5dedb12049327dfaf51c4a5b454255cc	Department of Psychology, University of the Witwatersrand, Johannesburg, South Africa; Department of Speech Pathology and Audiology, University of the Witwatersrand, Johannesburg, South Africa	Seabi, J., Department of Psychology, University of the Witwatersrand, Johannesburg, South Africa; Seedat, J., Department of Speech Pathology and Audiology, University of the Witwatersrand, Johannesburg, South Africa; Khoza-Shangase, K., Department of Speech Pathology and Audiology, University of the Witwatersrand, Johannesburg, South Africa; Sullivan, L., Department of Speech Pathology and Audiol…	Purpose: The purpose of this paper is to investigate students' perceptions of the challenges that they face and the factors that facilitate and impede teaching and learning within the context of transformation at the University of the Witwatersrand. The paper also explores students' perceptions of transformation directly and their ideas related to facilitating this process. The authors reflect br…	Apartheid; English second language; Institutions of higher learning; South Africa; Transformation					Seabi, J.; Department of Psychology, , Johannesburg, South Africa; email: joseph.seabi@wits.ac.za		0951354X			English	Int. J. Educ. Manage.	Final		Scopus	2-s2.0-84890869883
Tayem, Y. I., Alshammari, A., Albalawi, N., & Shareef, M. (2020). Language barriers to studying medicine in english: Perceptions of final-year medical students at the arabian gulf university. [Barrières linguistiques aux études de médecine en anglais: Perception des étudiants de dernière année de médecine à l’université du Golfe Arabique] Eastern Mediterranean Health Journal, 26(2), 233-238. doi:…	Ok	Tayem Y.I., Alshammari A., Albalawi N., Shareef M.	Bahrain	Students	Healthcare	questionnaire	Quantitative	This study examined the views of final-year Arab medical students of a language barrier and its effect on their learning and academic performance, and their language preference for medial education		Of the 142 students, 99 (70%) responded. Most students did not feel a language barrier irrespective of their proficiency in English (P = 0.088). Most respondents did not think that language issues made studying more difficult, although there was a significant difference in responses between students considered proficient in English and those less proficient (P = 0.005). Most students (82%) were n…	Most students thought that learning in English did not affect their academic learning and performance. However, a good proportion supported being taught medicine in Arabic and English	55535622300;57207034310;57758058400;57190248473;	Language barriers to studying medicine in english: Perceptions of final-year medical students at the Arabian Gulf university [Barrières linguistiques aux études de médecine en anglais: Perception des étudiants de dernière année de médecine à l’université du Golfe Arabique]	2020	Eastern Mediterranean Health Journal	26	2		233	238	2	10.26719/2020.26.2.233	https://www.scopus.com/inward/record.uri?eid=2-s2.0-85080135275&doi=10.26719%2f2020.26.2.233&partnerID=40&md5=a49e94676abe1b4b7d145035ca2041b6	Department of Pharmacology and Therapeutics, College of Medicine and Medical Sciences, Arabian Gulf University, Manama, Bahrain; College of Medicine and Medical Sciences, Arabian Gulf University, Manama, Bahrain	Tayem, Y.I., Department of Pharmacology and Therapeutics, College of Medicine and Medical Sciences, Arabian Gulf University, Manama, Bahrain; Alshammari, A., College of Medicine and Medical Sciences, Arabian Gulf University, Manama, Bahrain; Albalawi, N., College of Medicine and Medical Sciences, Arabian Gulf University, Manama, Bahrain; Shareef, M., College of Medicine and Medical Sciences, Arab…	Background: English is the language of instructions in many medical schools in the Arab world. Its use may create a language barrier and adversely affect an individual’s learning and later professional life. Aims: This study examined the views of final-year Arab medical students of a language barrier and its effect on their learning and academic performance, and their language preference for medi…	Academic performance; Arab world; Language; Learning; Medical education	adult; Arab world; article; Bahrain; communication barrier; English proficiency; female; human; learning; major clinical study; male; medical education; medical student; perception; Persian Gulf; questionnaire; clinical competence; comprehension; language; medical education; medical school; medical student; multilingualism; procedures; psychology; university; young adult; Adult; Bahrain; Clinical…				Tayem, Y.I.; Department of Pharmacology and Therapeutics, Bahrain; email: yasiniyt@agu.edu.bh	World Health Organization	10203397	EMHJA	32141602	English	East. Mediterr. Health J.	Final	All Open Access, Bronze	Scopus	2-s2.0-85080135275
Waterval, D., Frambach, J. M., Scott, S. M., Driessen, E. W., & Scherpbier, A. J. J. A. (2018). Crossborder curriculum partnerships: Medical students' experiences on critical aspects. BMC Medical Education, 18(1) doi:10.1186/s12909-018-1239-6	Ok	Waterval D., Frambach J.M., Scott S.M., Driessen E.W., Scherpbier A.J.J.A.	several countries The Netherlands Saudi Arabia United Kingdom Egypt United States Qatar	Students	Healthcare	questionnaire	Mixed	The past decade has witnessed an upsurge in medical curriculum partnerships established across national boundaries to offer students at the foreign institution (host) a learning experience comparable to that of students at the exporting institution (home). However, since the learning environments and national healthcare contexts differ greatly between institutions, concerns have been raised in th…		Findings revealed that students generally held positive views of the education they received. Switching to a new language of instruction (English) and learning environment was not perceived as a major obstacle. However, a significant portion of students who as non-nationals did not speak the language of the patient population felt this complicated effective workplace-based learning	Despite differences in learning experiences, host students felt the partnership afforded opportunities to acquire unique academic competencies and boost their career. Further adaptation of the home curriculum to the host country healthcare system may be beneficial, without losing sight of medical curriculum partnerships’ potential to offer graduates an international outlook on global healthcare	56481643500;55316796000;57189894975;6506626700;35403072600;	Crossborder curriculum partnerships: Medical students' experiences on critical aspects	2018	BMC Medical Education	18	1	129			3	10.1186/s12909-018-1239-6	https://www.scopus.com/inward/record.uri?eid=2-s2.0-85048227987&doi=10.1186%2fs12909-018-1239-6&partnerID=40&md5=4dba52970a7c33a172d16ba3741dbf19	School of Health Professions Education, Maastricht University, P.O. Box 616, Maastricht, 6200 MD, Netherlands; School of Health Professions Education, Faculty of Health, Medicine and Life Sciences, Maastricht University, Maastricht, Netherlands; Weill Cornell Medicine-Qatar, Qatar Foundation, Doha, Qatar; Department of Educational Development and Research, Faculty of Health, Medicine and Life Sci…	Waterval, D., School of Health Professions Education, Maastricht University, P.O. Box 616, Maastricht, 6200 MD, Netherlands; Frambach, J.M., School of Health Professions Education, Faculty of Health, Medicine and Life Sciences, Maastricht University, Maastricht, Netherlands; Scott, S.M., Weill Cornell Medicine-Qatar, Qatar Foundation, Doha, Qatar; Driessen, E.W., Department of Educational Develop…	Background: The past decade has witnessed an upsurge in medical curriculum partnerships established across national boundaries to offer students at the foreign institution (host) a learning experience comparable to that of students at the exporting institution (home). However, since the learning environments and national healthcare contexts differ greatly between institutions, concerns have been …	Crossborder curriculum partnerschips; Internationalization; Student survey; Transnational education	attitude; clinical trial; communication barrier; cultural factor; curriculum; decision making; doctor patient relation; female; health care delivery; human; international cooperation; language; learning; male; medical education; medical student; motivation; multicenter study; procedures; psychology; public relations; qualitative research; questionnaire; young adult; Attitude; Career Choice; Commu…				Waterval, D.; School of Health Professions Education, P.O. Box 616, Netherlands; email: d.waterval@maastrichtuniversity.nl	BioMed Central Ltd.	14726920		29879976	English	BMC Med. Educ.	Final	All Open Access, Gold, Green	Scopus	2-s2.0-85048227987
Wilang, J. D., & Nupong, S. (2022). Factors affecting EMI attitudes of engineering and nursing students. Theory and Practice in Language Studies, 12(3), 437-446. doi:10.17507/tpls.1203.03	Ok	Wilang J.D., Nupong S.	Thailand	Students	engineering and nursing	questionnaire	Quantitative	survey questionnaire was used to investigate the attitudes of engineering and nursing students toward EMI. Differences of attitudes based on the program of study, gender, nationality, year level, number of years studying English, the language of instruction in high school, Common European Framework of Reference for Languages (CEFR) level, and perceived proficiencies in speaking, reading, writing,…	attudes students	Findings have shown significant differences in various aspects of EMI based on the program of study, CEFR level, and perceived proficiencies of the four macro language skills. Also, eight factors were elicited, including difficulties of the English language, availability of resources and opportunities, personal goals in life, limitations of time when studying content courses in English, providing…	implications were outlined to support the implementation of EMI, dubbed as an “unstoppable train”, in similar contexts like Thailand.	57195297132;57487843100;	Factors Affecting EMI Attitudes of Engineering and Nursing Students	2022	Theory and Practice in Language Studies	12	3		437	446	1	10.17507/tpls.1203.03	https://www.scopus.com/inward/record.uri?eid=2-s2.0-85126336228&doi=10.17507%2ftpls.1203.03&partnerID=40&md5=18a267c9da16ec60062ec94497d55a10	School of Foreign Languages, Institute of Social Technology, Suranaree University of Technology, Nakhon Ratchasima, Thailand; School of Business English, Faculty of Humanities and Social Sciences, Nakhon Ratchasima Rajabhat University, Nakhon Ratchasima, Thailand	Wilang, J.D., School of Foreign Languages, Institute of Social Technology, Suranaree University of Technology, Nakhon Ratchasima, Thailand; Nupong, S., School of Business English, Faculty of Humanities and Social Sciences, Nakhon Ratchasima Rajabhat University, Nakhon Ratchasima, Thailand	The internationalization of higher education has led to the increasing number of English as a Medium of Instruction (EMI) programs in contexts where English is not the first language nor the medium of communication, including Thailand. The introduction of EMI programs, however, is not without challenges. Therefore, a survey questionnaire was used to investigate the attitudes of engineering and nu…	Attitudes; Engineering; English as a medium of instruction; Nursing						Academy Publication	17992591			English	Theory Pract. Lang. Stud.	Final	All Open Access, Bronze	Scopus	2-s2.0-85126336228
Yang, M., O'Sullivan, P. S., Irby, D. M., Chen, Z., Lin, C., & Lin, C. (2019). Challenges and adaptations in implementing an english-medium medical program:A case study in china. BMC Medical Education, 19(1) doi:10.1186/s12909-018-1452-3	Ok	Yang M., O'Sullivan P.S., Irby D.M., Chen Z., Lin C., Lin C.	China	Students and Teachers	Healthcare	questionnaire and focus group	Mixed	Increasingly, non-English speaking countries use English as the medium of instruction (EMI) to teach academic subjects. This study investigated the challenges and adaptation strategies of teachers and students in an EMI medical education program in China.	challenges and adaptation strategies of teachers and students in an EMI medical education program in China.	There were no significant differences in admission and graduation test scores for EMI and non-EMI students. Four challenges with the EMI program were identified: (1) insufficient/inappropriate teaching materials, (2) unsatisfactory teaching, (3) inadequate class interactions, and (4) failure to teach medical humanities. To address these challenges, teachers and students used adaptive strategies, …	EMI programs are difficult to initiate, requiring faculty development and institutional support, and student self and peer group learning strategies to be successful. The adaptive strategies employed by both students and teachers offer insights into how other EMI programs might strengthen their implementation	56171991500;35602261800;22034606200;57205370968;57205369137;8510082300;	Challenges and adaptations in implementing an English-medium medical program:a case study in China	2019	BMC Medical Education	19	1	15			12	10.1186/s12909-018-1452-3	https://www.scopus.com/inward/record.uri?eid=2-s2.0-85059796431&doi=10.1186%2fs12909-018-1452-3&partnerID=40&md5=c484048c71db9b4175dda62a1d04fda2	Department of Foreign Languages, Shantou University Medical College, Shantou, China; Center for Faculty Educators, School of Medicine, University of California San Francisco, San Francisco, United States; Department of Histology and Embryology, Medical Education Assessment and Research Center, Shantou University Medical College, Shantou, China	Yang, M., Department of Foreign Languages, Shantou University Medical College, Shantou, China; O'Sullivan, P.S., Center for Faculty Educators, School of Medicine, University of California San Francisco, San Francisco, United States; Irby, D.M., Center for Faculty Educators, School of Medicine, University of California San Francisco, San Francisco, United States; Chen, Z., Department of Foreign La…	Background: Increasingly, non-English speaking countries use English as the medium of instruction (EMI) to teach academic subjects. This study investigated the challenges and adaptation strategies of teachers and students in an EMI medical education program in China. Methods: Data were collected on EMI and non-EMI students' test performances and student and teacher perceptions of the program. Tes…	Adaptive teaching and learning strategies; Challenges; English as the medium of instruction	article; China; Chinese (language); genetic transcription; human; human experiment; learning; medical education; medical humanities; peer group; perception; skill; student; task performance; teacher; China; communication barrier; curriculum; information processing; learning; medical education; medical student; problem based learning; procedures; program evaluation; publication; standards; teachin…	[2018]68; 17YJA740063	This study was financially supported by Ministry of Education Humanities and Social Science Project (grant No. 17YJA740063) and Guangdong Province Education Promotion Projects (grant No. [2018]68) in People’s Republic of China. The funding body did not play any roles in the design of the study, collection, analysis, and interpretation of the data, and writing the manuscript.		Lin, C.; Department of Foreign Languages, China; email: cocolin@stu.edu.cn	BioMed Central Ltd.	14726920		30626387	English	BMC Med. Educ.	Final	All Open Access, Gold, Green	Scopus	2-s2.0-85059796431
Yousif, M. A., Eldalo, A. S., Abd Allah, M. A., Al-Sawat, M. A., Al-Wahaibi, H. M., Al-Osaimi, A. A. S., & Al-Gethami, S. H. (2014). Pharmacy education instruction: Preference and practices, saudi students' perception. Saudi Pharmaceutical Journal, 22(4), 309-314. doi:10.1016/j.jsps.2013.06.005	Ok	Yousif M.A., Eldalo A.S., Abd Allah M.A., Al-Sawat M.A., Al-Wahaibi H.M., Al-Osaimi A.A.S., Al-Gethami S.H.	Saudi	Students	Healthcare	questionnaire	Quantitative	The methods of instruction in pharmacy education are crucial and meant to suit the professional development and encompass the advanced variety of services and functions provided by the pharmacists to serve individual patients. The aim of this study was to determine the students’ opinions on the adopted and preferred methods of instruction in pharmacy colleges in Kingdom of Saudi Arabia.	attitudes students	Three hundred pharmacy students were interviewed. Direct type of lecturing was dominant (53.7%). The most frequently used language of instruction was combined English and Arabic (48.8%), that was mostly preferred by 52.5% of the students. Handouts were the most adopted post-lecture learning method (48.3%), while only 5.9% used student’s self-written notes. A cocktail of traditional and electronic…	the current study demonstrates specific opinions that are to be considered for improved type of instruction to enable Saudi pharmacy students for better understanding of taught subjects. Adopting an interactive method of lecturing will enable an active role of students in the learning process. Selecting bilingual type of instruction media enhances the knowledge acquaintance as well as attracting …	7005638006;55308236300;55787116800;55786317500;55786358300;55786567400;55787449000;	Pharmacy education instruction: Preference and practices, Saudi students' perception	2014	Saudi Pharmaceutical Journal	22	4		309	314	9	10.1016/j.jsps.2013.06.005	https://www.scopus.com/inward/record.uri?eid=2-s2.0-84906268000&doi=10.1016%2fj.jsps.2013.06.005&partnerID=40&md5=784e3154edca0197d5e66790ebe337b2	Department of Clinical Pharmacy, College of Pharmacy, Taif University, Saudi Arabia; Department of Pharmacology, College of Pharmacy, Taif University, Saudi Arabia; Pharm. D student, College of Pharmacy, Taif University, Saudi Arabia	Yousif, M.A., Department of Clinical Pharmacy, College of Pharmacy, Taif University, Saudi Arabia; Eldalo, A.S., Department of Pharmacology, College of Pharmacy, Taif University, Saudi Arabia; Abd Allah, M.A., Department of Clinical Pharmacy, College of Pharmacy, Taif University, Saudi Arabia; Al-Sawat, M.A., Pharm. D student, College of Pharmacy, Taif University, Saudi Arabia; Al-Wahaibi, H.M., …	Aim/Background: The methods of instruction in pharmacy education are crucial and meant to suit the professional development and encompass the advanced variety of services and functions provided by the pharmacists to serve individual patients. The aim of this study was to determine the students' opinions on the adopted and preferred methods of instruction in pharmacy colleges in Kingdom of Saudi A…	Education; Instruction; Perception; Pharmacy; Students	academic achievement; adult; age; article; audiovisual aid; cross-sectional study; curriculum; female; gender; human; language; Likert scale; male; normal human; paramedical education; pharmacy; pharmacy student; place preference; post lecture learning method; questionnaire; rural area; Saudi Arabia; self written note; teaching; urban area	Taif University, TU	Authors are acknowledging the grant that was provided by the Secretariat of Postgraduates and Scientific Research, Taif University.		Yousif, M.A.; Department of Clinical Pharmacy, College of Pharmacy, Taif University, Al-Haweiah, P.O. Box 888, Zip Code 21974, Saudi Arabia; email: mirghani53@yahoo.com	Elsevier	13190164	SPJOE		English	Saudi Pharm. J.	Final	All Open Access, Gold, Green	Scopus	2-s2.0-84906268000

## Sheet: Sheet1
Authors	APA style 6th edition	Decision
Al Zumor A.Q.	Al Zumor, A. Q. (2019). Challenges of using emi in teaching and learning of university scientific disciplines: Student voice. International Journal of Language Education, 3(1), 74-90. doi:10.26858/ijole.v1i1.7510	Ok
Al-Zubi D., El-Sharif A., Alzoubi K.H.	Al-Zubi, D., El-Sharif, A., & Alzoubi, K. H. (2022). Changes in the attitudes of professors and students of medicine towards arabicizing medical terms in the faculties of medicine: A study from jordan. Heliyon, 8(12) doi:10.1016/j.heliyon.2022.e12022	Ok
Alenezi M.Q., Kebble P.G.	Alenezi, M. Q., & Kebble, P. G. (2018). Investigating saudi medical students' attitudes towards english-arabic code-switching in classroom instruction. Asian ESP Journal, 14(1), 147-166. Retrieved from www.scopus.com	Ok
Alfakhry G.M., Dashash M., Jamous I.	Alfakhry, G. M., Dashash, M., & Jamous, I. (2020). Native arabic language use acceptability and adequacy in health professional instruction: Students and faculty's perspectives. Health Professions Education, 6(4), 454-464. doi:10.1016/j.hpe.2020.06.004	Ok
Alhamami M., Almelhi A.	Alhamami, M., & Almelhi, A. (2021). English or arabic in healthcare education: Perspectives of healthcare alumni, students, and instructors. Journal of Multidisciplinary Healthcare, 14, 2537-2547. doi:10.2147/JMDH.S330579	Ok
Alnasser S.M.N.	Alnasser, S. M. N. (2022). A gender-based investigation into the required english language policies in saudi higher education institutions. PLoS ONE, 17(9 September) doi:10.1371/journal.pone.0274119	Rejected: General Policies concerning English language use in Saudi academia remain ungoverned, thus leading to implicit personal policies (i.e., self-directed policies).
Alrajhi Z., Alhamdan A., Alshareef M., Almubaireek O., Mahmoud M., Omair A., Masuadi E., Hamad B.	Alrajhi, Z., Alhamdan, A., Alshareef, M., Almubaireek, O., Mahmoud, M., Omair, A., . . . Hamad, B. (2019). Perspectives of medical students and teaching faculty on teaching medicine in their native language. [Points de vue des étudiants en médecine et du corps professoral concernant l’enseignement de la médecine dans leur langue maternelle] Eastern Mediterranean Health Journal, 25(8), 562-566. do…	Ok
Alshareef M., Mobaireek O., Mohamud M., Alrajhi Z., Alhamdan A., Hamad B.	Alshareef, M., Mobaireek, O., Mohamud, M., Alrajhi, Z., Alhamdan, A., & Hamad, B. (2018). Decision makers’ perspectives on the language of instruction in medicine in saudi arabia: A qualitative study. Health Professions Education, 4(4), 308-316. doi:10.1016/j.hpe.2018.03.006	Ok
Alsuliman T., Alasadi L., Mouki A., Alsaid B.	Alsuliman, T., Alasadi, L., Mouki, A., & Alsaid, B. (2019). Language of written medical educational materials for non-english speaking populations: An evaluation of a simplified bi-lingual approach. BMC Medical Education, 19(1) doi:10.1186/s12909-019-1846-x	Ok
Aratani Y., Liu C.H.	Aratani, Y., & Liu, C. H. (2015). English proficiency, threshold language policy and mental health service utilization among asian-american children. Archives of Psychiatric Nursing, 29(5), 326-332. doi:10.1016/j.apnu.2015.06.006	Rejected: This paper explores the role of English proficiency, ethnicity, and California'sthreshold language policy in the rates of discontinuing mental health services among Asian-American children
Arco-Tirado J.L., Fernández-Martín F., Ramos-García A.M., Littvay L., Villoria J., Naranjo J.A.	Arco-Tirado, J. L., Fernández-Martín, F., Ramos-García, A. M., Littvay, L., Villoria, J., & Naranjo, J. A. (2018). A counterfactual impact evaluation of a bilingual program on students’ grade point average at a spanish university. Evaluation and Program Planning, 68, 81-89. doi:10.1016/j.evalprogplan.2018.02.013	Rejected: the Primary Education Teacher Training Degree.
Baba M.L., Dahl-Jørgensen C.	Baba, M. L., & Dahl-Jørgensen, C. (2013). Language policy in practice: Re-bordering the nation. International Migration, 51(2), 60-76. doi:10.1111/imig.12048	Rejected: We present findings from an anthropological field study on the role of language and language policyin migration from Poland to Norway, and the larger implications for emerging language and immigration policy in Europe. Initial fieldwor
Bafghi E.P.	Bafghi, E. P. (2016). Set the nurses working hours using graph coloring method and algorithm of cooling of metals. International Journal of Applied Engineering Research, 11(14), 8195-8199. Retrieved from www.scopus.com	Rejected: The project aims to design intelligent system as a scheduler by a system of cooling of the metal algorithm to provide better services to patients and overcome traditional scheduling problems. Of course, the property of graph coloring is used to do this.
Bandhu S., Raje S.	Bandhu, S., & Raje, S. (2014). Experiences with E-learning in ophthalmology. Indian Journal of Ophthalmology, 62(7), 792-794. doi:10.4103/0301-4738.138297	Rejected: elearning as medium of instruction. E-learning is the use of internet for the purpose of education. E-learning in medicaleducation is at a nascent stage in our country. The present study was carried out with the purpose of introducing e-learning to third year medical students
Banerjee M., Bhat A.A., Chatterjee A.	Banerjee, M., Bhat, A. A., & Chatterjee, A. (2015). A comparative study of mental health problems among 11-17 year old indian school children living in areas with persistent political violence and children of the same age group living under standard conditions using selfrated strength and difficulty questionnaire. Sri Lanka Journalof Child Health, 44(2), 88-91. doi:10.4038/sljch.v44i2.7990	Rejected: To compare behaviour abnormalities in children living in disturbed areas with persistent political violence and children of the same age group living under standard conditions. Method: A comparative study was carried out in 11-17 year old school children of grades 9-12 from private schools Srinagar, Kashmir
Bavdekar S.	Bavdekar, S. (2019). Dreem study: Students’ perceptions of learning environment in a medical college in mumbai, india. Journal of Association of Physicians of India, 67, 50-54. Retrieved from www.scopus.com	OK
Berkowitz O., Hoffmann M.	Berkowitz, O., & Hoffmann, M. (2020). Development of the european physician Assistant/Associate collaboration and the first EuroPA-C conference. Journal of Physician Assistant Education, 31(3), 172-176. doi:10.1097/JPA.0000000000000315	Ok
Bonifacci P., Canducci E., Gravagna G., Palladino P.	Bonifacci, P., Canducci, E., Gravagna, G., & Palladino, P. (2017). English as a foreign language in bilingual language-minority children, children with dyslexia and monolingual typical readers. Dyslexia, 23(2), 181-206. doi:10.1002/dys.1553	Rejected: The present study was aimed at investigating literacy skills in English as a foreign language in three different groups of children: monolinguals with dyslexia
Britton E.R., Austin T.Y.	Britton, E. R., & Austin, T. Y. (2020). “Keeping words in context”: Language policy and social identification in an immigrant job training program. Journal of Language, Identity and Education, doi:10.1080/15348458.2020.1833728	Ok
Brouwer E., Frambach J., Somodi K., Nadarajah V.D., Driessen E.	Brouwer, E., Frambach, J., Somodi, K., Nadarajah, V. D., & Driessen, E. (2020). ‘Being international is always a good thing’: A multicentre interview study on ethics in international medical education. Medical Education, 54(5), 427-435. doi:10.1111/medu.14054	Ok
Chan J.L., Ahmad B., Sanusi S.Y., Sinor M.Z.	Chan, J. L., Ahmad, B., Sanusi, S. Y., & Sinor, M. Z. (2022). Effectiveness of oral hygiene instruction on the periodontal health among adults: A systematic review. Archives of Orofacial Sciences, 17(1), 1-8. doi:10.21315/aos2022.1701.RV01	Rejected: Oral health professionals frequently provide oral hygiene instruction (OHI) during dental visits, yet the evidence for its effectiveness is inconclusive. The main objective of this study was to examine the evidence on the effectiveness of various oral hygiene teaching approaches on periodontal health in adults.
Chen X.	Chen, X. (2016). A study of implementation of national language policies in a local higher institution: A case study from china. SpringerPlus, 5(1) doi:10.1186/s40064-016-3731-y	Ok
Choi H., Kim J., Bang K.-S., Park Y.-H., Lee N.-J., Kim C.	Choi, H., Kim, J., Bang, K. -., Park, Y. -., Lee, N. -., & Kim, C. (2015). Applying the flipped learning model to an english-medium nursing course. Journal of Korean Academy of Nursing, 45(6), 939-948. doi:10.4040/jkan.2015.45.6.939	Ok
Daubert E.N., Yu Y., Grados M., Shafto P., Bonawitz E.	Daubert, E. N., Yu, Y., Grados, M., Shafto, P., & Bonawitz, E. (2020). Pedagogical questions promote causal learning in preschoolers. Scientific Reports, 10(1) doi:10.1038/s41598-020-77883-5	Rejected: What maximizes instructional impact in early childhood
Davenport C.J., Swami V.	Davenport, C. J., & Swami, V. (2022). Getting help as a depressed dad: A lived experience narrative of paternal postnatal depression, with considerations for healthcare practice. Journal of Psychiatric and Mental Health Nursing, doi:10.1111/jpm.12854	Ok free to read but not download
Davies S., Janus M., Reid-Westoby C., Duku E., Schlanger P.	Davies, S., Janus, M., Reid-Westoby, C., Duku, E., & Schlanger, P. (2021). Does the early development instrument predict academic achievement in ontario french schools? Canadian Journal of Behavioural Science, doi:10.1037/cbs0000285	Rejected: grade 3 The Early Development Instrument (EDI) is a holistic assessment of child development that was developed independently of any particular educational curriculum
De Wilde J., Van Hoof S., Decock S., Rillof P., Van Praet E.	De Wilde, J., Van Hoof, S., Decock, S., Rillof, P., & Van Praet, E. (2018). Shifting multilingual strategies in a flemish public healthcare service. Multilingua, 37(4), 377-401. doi:10.1515/multi-2017-0108	Rejected: This paper addresses the challenges service providers are facing amidst growing ethnolinguistic diversity in a neoliberal climate. We focus on the public service provider Kind & Gezin (K&G), the agency that monitors the wellbeing of young children on behalf of the Flemish authorities in Belgium.
DeFosset A.R., Sivashanmugam M., Mosst J., Kuo T.	DeFosset, A. R., Sivashanmugam, M., Mosst, J., & Kuo, T. (2022). Clinic- and community-based national diabetes prevention programs in los angeles. Health Education and Behavior, 49(4), 647-657. doi:10.1177/10901981211016759	Rejected: The present study describes participant characteristics and lifestyle change outcomes across a sample of clinic- and community-based National DPPs which delivered services in Los Angeles during 2015 to 2018 (two clinics, two CBOs, combined n = 265 participants).
Dockrell J.E., Forrest C.L., Law J., Mathers S., Charlton J.	Dockrell, J. E., Forrest, C. L., Law, J., Mathers, S., & Charlton, J. (2022). Screening for language difficulties in disadvantaged populations on entry to early years education: Challenges and opportunities. Frontiers in Pediatrics, 10 doi:10.3389/fped.2022.833603	Rejected: Children aged 3–4 years (n = 876) were recruited from deprived areas in England, and a significant minority of the sample were second language learners. Oral language ability was assessed using child administered standardized measures, and parents reported on children’s language. We adapted the Language Use Inventory
Dube M.B., Mlotshwa P.R.	Dube, M. B., & Mlotshwa, P. R. (2018). Factors influencing enrolled nursing students' academic performance at a selected private nursing education institution in KwaZulu-natal. Curationis, 41(1), e1-e7. doi:10.4102/curationis.v41i1.1850	Ok
Fogarty T.	Fogarty, T. (2019). A description of gamification in teaching second language pharmacy technician students. Pharmacy Education, 19(1), 212-218. Retrieved from www.scopus.com	ok
Fuentes R.	Fuentes, R. (2016). Language, identity, and citizenship in a U.S. university: Immigrant english learners’ identity (re)positioning. Current Issues in Language Planning, 17(3-4), 405-421. doi:10.1080/14664208.2016.1203051	Rejected: this study examines immigrant ELs’ experiences with institutional policies and practices that assign them labels based on their citizenship status and how those labels then affect their identities and sense of place within the university.
Gagliardi A.R., Dunn S., Foster A.M., Grace S.L., Khanlou N., Stewart D.E., Straus S.E.	Gagliardi, A. R., Dunn, S., Foster, A. M., Grace, S. L., Khanlou, N., Stewart, D. E., & Straus, S. E. (2020). Is patient-centred care for women a priority for policy-makers? content analysis of government policies. Health Research Policy and Systems, 18(1) doi:10.1186/s12961-020-0533-z	Rejected: Considerable research shows that women experience gendered disparities in healthcareaccess and quality. Patient-centred care (PCC) could reduce inequities by addressing the patient's clinicaland personal needs. Healthcare policies can influence service delivery to optimise patient outcomes.
George L.S., Lakra A.J., Kamath A.	George, L. S., Lakra, A. J., & Kamath, A. (2017). Factors affecting learning among undergraduate nursing students: Cross-sectional survey. Journal of Clinical and Diagnostic Research, 11(11), JC01-JC04. doi:10.7860/JCDR/2017/29111.10823	Ok
Goel T.C.	Goel, T. C. (2020). Time has come..to improve comprehension of medical Education—Hindi neologism. Indian Journal of Surgery, 82(6), 1058-1062. doi:10.1007/s12262-020-02127-9	Ok
Gomashie G.A.	Gomashie, G. A. (2021). Nahuatl and spanish in contact: Language practices in mexico. Languages, 6(3) doi:10.3390/languages6030135	Rejected: The study reports on adults’ linguistic use of Nahuatl in the bilingual community of Santiago Tlaxco, Mexico.
González Núñez G.	González Núñez, G. (2013). Translating for linguistic minorities in northern ireland: A look at translation policy in the judiciary, healthcare, and local government. Current Issues in Language Planning, 14(3-4), 474-489. doi:10.1080/14664208.2013.827036	Rejected: this paper explores the role of translation in language policy in Northern Ireland. By doing so, we highlight the translation implications of policy decisions. This helps to illustrate the complexity of language and translation policy.
Hall M.L.	Hall, M. L. (2020). The input matters: Assessing cumulative language access in deaf and hard of hearing individuals and populations. Frontiers in Psychology, 11 doi:10.3389/fpsyg.2020.01407	Rejected: Deaf and hard-of-hearing (DHH) children present several challenges to traditional methods of language assessment, and yet language assessment for this population is absolutely essential for optimizing their developmental potential
Hamid M.O., Hoang N.T.H., Kirkpatrick A.	Hamid, M. O., Hoang, N. T. H., & Kirkpatrick, A. (2019). Language tests, linguistic gatekeeping and global mobility. Current Issues in Language Planning, 20(3), 226-244. doi:10.1080/14664208.2018.1495371	Rejected: This article examines the processes of linguistic gatekeeping by the use of language tests in the context of migration. We draw on half a dozen cases of test-takers of the International English Language Testing System (IELTS) test who applied for entry into Australia on student, work or residency visa.
Hanes W.F.	Hanes, W. F. (2019). Between empires: Language and identity in brazilian science since the belle époque. Target, 31(2), 248-266. doi:10.1075/target.19092.han	further journal
Haq M.A.	Haq, M. A. (2016). Association between socio-demographic background and self-esteem of university students. Psychiatric Quarterly, 87(4), 755-762. doi:10.1007/s11126-016-9423-5	Rejected: The majority of students belongs to master degree program and the majority belong to science faculty.
Heilala C., Komulainen E., Santavirta N.	Heilala, C., Komulainen, E., & Santavirta, N. (2016). Forgetting your mother tongue: The effect of early separation on the socioeconomic position. International Journal of Migration, Health and Social Care, 12(2), 120-132. doi:10.1108/IJMHSC-10-2013-0038	Rejected: During Second World War 48,628 Finnish children were evacuated to Sweden and temporarily placed in foster care. The purpose of this paper is to explore the relationships between the parental socioeconomic position (SEP), evacuation, language acquisition, and education and to analyze how these are related to SEP in separated compared to non-separated in later life
Hemberg J., Sved E.	Hemberg, J., & Sved, E. (2021). The significance of communication and care in one’s mother tongue: Patients’ views. Nordic Journal of Nursing Research, 41(1), 42-53. doi:10.1177/2057158519877794	Rejected: The aim of this study was to explore the importance of patients receiving care in their mother tongue.
Hijji B.M.	Hijji, B. M. (2017). Flaws of multiple choice questions in teacher-constructed nursing examinations: A pilot descriptive study. Journal of Nursing Education, 56(8), 490-496. doi:10.3928/01484834-20170712-08	Ok
Hooyman A., Wulf G., Lewthwaite R.	Hooyman, A., Wulf, G., & Lewthwaite, R. (2014). Impacts of autonomy-supportive versus controlling instructional language on motor learning. Human Movement Science, 36, 190-198. doi:10.1016/j.humov.2014.04.005	Rejected: The authors examined the influence of autonomy-supportive (ASL), controlling (CL), and neutral instructional language (NL) on motor skill learning (cricket bowling action). Prior to and several times during the practice phase, participants watched the same video demonstration of the bowling action but with different voice-over instructions.
Horwood C., Mapumulo S., Haskins L., John V., Luthuli S., Tylleskär T., Mutombo P., Engebretsen I.M.S., Mapatano M.A., Hatløy A.	Horwood, C., Mapumulo, S., Haskins, L., John, V., Luthuli, S., Tylleskär, T., . . . Hatløy, A. (2021). A North–South-south partnership in higher education to develop health research capacity in the democratic republic of the congo: The challenge of finding a common language. Health Research Policy and Systems, 19(1) doi:10.1186/s12961-021-00728-8	Ok
Huh S.	Huh, S. (2018). Journal metrics of clinical and molecular hepatology based on the web of science core collection. Clinical and Molecular Hepatology, 24(2), 137-143. doi:10.3350/cmh.2018.0018	Rejected: Eight years have passed since Clinical and Molecular Hepatology changed its language policy to English-only in September 2010. The journal has been included in PubMed Central since September 2010. Present title continues the Korean Journal of Hepatology since June 2012. It has been indexed in the Web of Science Core Collection as an Emerging Sources Citation Index journal since 2015. I …
Ijaz N., Boon H.	Ijaz, N., & Boon, H. (2018). Medical pluralism and the state: Regulatory language requirements for traditional acupuncturists in english-dominant diaspora jurisdictions. SAGE Open, 8(2) doi:10.1177/2158244018768677	Rejected: Regulation of traditional acupuncturists has proven controversial in several jurisdictions. In this work, we detail and analyze the range of English-language registration, practice, and record-keeping requirements for regulated traditional acupuncturists across Canada, the United States, and Australia
Irfan S.S., Ahmed Z., Farooq M.Z., Khan B.A., Khan A.H.	Irfan, S. S., Ahmed, Z., Farooq, M. Z., Khan, B. A., & Khan, A. H. (2016). Evaluation of “Ghabrahat” as a medical term: A survey of healthcare professionals. Journal of the Pakistan Medical Association, 66(1), 122-124. Retrieved from www.scopus.com	Rejected: This was a cross sectional descriptive survey that determined the perception, knowledge, practices and opinion of medical students and doctors regarding the symptom "ghabrahat". The survey population included medical students and doctors from four University hospitals. We conclude that the term "ghabrahat" is a symptom commonly encountered in clinical practice.
Jabbarian J., Werner L.K., Kagoné M., Lemp J.M., McMahon S., Horstick O., Kazianga H., Kobiané J.-F., Fink G., De Neve J.-W.	Jabbarian, J., Werner, L. K., Kagoné, M., Lemp, J. M., McMahon, S., Horstick, O., . . . De Neve, J. -. (2022). “It’s the poverty”—Stakeholder perspectives on barriers to secondary education in rural burkina faso. PLoS ONE, 17(11 November) doi:10.1371/journal.pone.0277822	Rejected: To determine perceived barriers of secondary schooling in rural Burkina Faso
Jayashree G., Kasthuri S., Sangeetha J., Manjula T.R.	Jayashree, G., Kasthuri, S., Sangeetha, J., & Manjula, T. R. (2020). Assessment of level of general anxiety among the higher secondary school students. Medico-Legal Update, 20(2), 53-57. Retrieved from www.scopus.com	Rejected: This research has been undertaken to determine the level of general anxiety among the higher secondary school students at Kanchipuram District, Tamil Nadu.
Jin J.	Jin, J. (2017). Students’ silence and identity in small group interactions. Educational Studies, 43(3), 328-342. doi:10.1080/03055698.2016.1277135	Ok
Joe Y.J., Lee H.-K.	Joe, Y. J., & Lee, H. -. (2013). Does english-medium instruction benefit students in EFL contexts? A case study of medical students in korea. Asia-Pacific Education Researcher, 22(2), 201-207. doi:10.1007/s40299-012-0003-7	Ok
Kane F., Kennedy L., Sevdali C., Folli R., Rhys C.	Kane, F., Kennedy, L., Sevdali, C., Folli, R., & Rhys, C. (2019). Language made fun: Supporting eal students in primary education. Teanga, 10(Special issue 10), 113-125. doi:10.35903/teanga.v10i0.73	Rejected: Acquisition of English language skills is vital for the successful integration of children into English-medium Education. Newcomer children who are not proficient in the language of instruction
Karim N.H.A., Rashid N.R.A.	Karim, N. H. A., & Rashid, N. R. A. (2016). Evaluating the psychometric properties of a malay version of bostick's (1992) library anxiety scale. Malaysian Journal of Library and Information Science, 21(2), 1-11. doi:10.22452/mjlis.vol21no2.1	Ok
Karpava S.	Karpava, S. (2021). The effect of the family type and home literacy environment on the development of literacy skills by bi-/multilingual children in cyprus. Languages, 6(2) doi:10.3390/languages6020102	Rejected: Literacy is a broad term that includes reading and writing abilities, as well as cognitive skills that are socially and culturally constructed
Kast J., Lindner K.-T., Gutschik A., Schwab S.	Kast, J., Lindner, K. -., Gutschik, A., & Schwab, S. (2021). Austrian teachers’ attitudes and self-efficacy beliefs regarding at-risk students during home learning due to COVID-19. European Journal of Special Needs Education, 36(1), 114-126. doi:10.1080/08856257.2021.1872849	rejected: The lockdown of schools in Austria and many other countries due to COVID-19 posed challenges to the school system and especially for teachers of at-risk students.
Khan I.A.	Khan, I. A. (2021). Teaching of pharmacy in saudi arabia: Relevance of english and digital pedagogy. Bahrain Medical Bulletin, 43(3), 618-620. Retrieved from www.scopus.com	Ok
Khan M.J., Jamil B., Sethi A., Noor U., Javed H., Adeeb H.	Khan, M. J., Jamil, B., Sethi, A., Noor, U., Javed, H., & Adeeb, H. (2021). Educational environment in the transition phase of curriculum at ayub medical college abbottabad, pakistan. Journal of Ayub Medical College, Abbottabad : JAMC, 33(3), 456-461. Retrieved from www.scopus.com	Ok
Khumalo L.	Khumalo, L. (2017). Intellectualization through terminology development. Lexikos, 27, 252-264. doi:10.5788/27-1-1402	Ok
Kite B.J.	Kite, B. J. (2020). How the medical professionals impact ASL and english families’ language planning policy. Psychology in the Schools, 57(3), 402-417. doi:10.1002/pits.22324	Rejected: This article explores the journey of eight hearing families of bimodal-bilingual deaf children as they navigate the decision-making process reflecting their beliefs and values about American Sign Language
Kumar M., Saxena I., Kumar J., Kumar G., Kapoor S.	Kumar, M., Saxena, I., Kumar, J., Kumar, G., & Kapoor, S. (2015). Assessment of lecture strategy with different teaching aids. Journal of Clinical and Diagnostic Research, 9(1), CC01-CC05. doi:10.7860/JCDR/2015/10805.5413	Ok
Law K.M.-H., Te V., Hill P.S.	Law, K. M. -., Te, V., & Hill, P. S. (2019). Cambodia's health professionals and the ASEAN mutual recognition arrangements: Registration, education and mobility. Human Resources for Health, 17(1) doi:10.1186/s12960-019-0349-5	Ok
Lazer-Pankiv O., Pysmenna I.	Lazer-Pankiv, O., & Pysmenna, I. (2021). Peculiarities of phonetic and orthographic adaptation of latin terms in english clinical terminology: On the issue of latin terminological competence formation of foreign medical students. Sustainable Multilingualism, 19(1), 173-202. doi:10.2478/sm-2021-0018	Ok
Lee J., Huber J., Jenkins J., Fredrick J.	Lee, J., Huber, J., Jenkins, J., & Fredrick, J. (2019). Language planning and pauses in story retell: Evidence from aging and parkinson's disease. Journal of Communication Disorders, 79, 1-10. doi:10.1016/j.jcomdis.2019.02.004	Rejected: We examined if and how pauses during connected speech reflect cognitive processes underlying language formulation in typical aging and Parkinson's disease
Levac D., Driscoll K., Galvez J., Mercado K., O'Neil L.	Levac, D., Driscoll, K., Galvez, J., Mercado, K., & O'Neil, L. (2017). OPTIMAL practice conditions enhance the benefits of gradually increasing error opportunities on retention of a stepping sequence task. Human Movement Science, 56, 129-138. doi:10.1016/j.humov.2017.10.017	Rejected: Physical therapists should implement practice conditions that promote motor skill learning after neurological injury.
Liu Y.	Liu, Y. (2022). Chinese parents’ experiences of reading english storybooks to preschool children: A case in guangzhou, china. Journal of Early Childhood Research, 20(4), 595-609. doi:10.1177/1476718X221105379	Rejected: This study investigated Chinese parents’ experiences of reading English storybooks to their preschool children
Lou N.M., Noels K.A.	Lou, N. M., & Noels, K. A. (2020). Mindsets about language learning and support for immigrants’ integration. International Journal of Intercultural Relations, 79, 46-57. doi:10.1016/j.ijintrel.2020.08.003	Rejected: People rely on their lay theories, or mindsets, to make meaning of their experience in intercultural contact. Given that proficiency in the local language is a crucial social marker of immigrants’ integration
MacWana J.I., Mehta K.G., Baxi R.K.	MacWana, J. I., Mehta, K. G., & Baxi, R. K. (2017). Predictors of overweight and obesity among school going adolescents of vadodara city in western india. International Journal of Adolescent Medicine and Health, 29(3) doi:10.1515/ijamh-2015-0078	Rejected: To assess the factors influencing overweight and obesity among school going adolescents of Vadodara city in Western India. Methods: The study was carried out among 1050 school going adolescents from 15 schools selected by systematic random sampling after taking written informed consent from the participants.
Makumane M.A., Fru R.N.	Makumane, M. A., & Fru, R. N. (2021). Learners’ attitudes towards multilingualism: The case of french in lesotho. African Identities, doi:10.1080/14725843.2021.2008305	Rejected: Purposive sampling was used to select 9 secondary school participants where French was taught.
Mann C., Canny B.J., Reser D.H., Rajan R.	Mann, C., Canny, B. J., Reser, D. H., & Rajan, R. (2013). Poorer verbal working memory for a second language selectively impacts academic achievement in university medical students. PeerJ, 2013(1) doi:10.7717/peerj.22	Ok
Matthews M., Gokool R.	Matthews, M., & Gokool, R. (2018). Second language teaching of vocation-specific isiZulu communication skills to health sciences students. South African Journal of African Languages, 38(2), 149-158. doi:10.1080/02572117.2018.1463703	Ok
Matthews M., Van Wyk J.	Matthews, M., & Van Wyk, J. (2016). Speaking the language of the patient: Indigenous language policy and practice. South African Family Practice, 58(1), 30-31. doi:10.1080/20786190.2015.1083718	Ok
Mayberry J.F.	Mayberry, J. F. (2016). Doctors qualified from chinese universities with "english parallel" courses registered with the general medical council. [El registro de los titulados de universidades chinas, con cursos de «Inglés Paralelo» con el Colegio de Médicos] Educacion Medica, 17(1), 16-19. doi:10.1016/j.edumed.2016.02.002	Ok
McCleary N., Andrews A., Morrow S., Wiener-Ogilvie S., Fletcher M., Steed L., Taylor S.J.C., Pinnock H.	McCleary, N., Andrews, A., Morrow, S., Wiener-Ogilvie, S., Fletcher, M., Steed, L., . . . Pinnock, H. (2016). Educating professionals to support self-management in people with asthma or diabetes: Protocol for a systematic review and scoping exercise. BMJ Open, 6(10) doi:10.1136/bmjopen-2016-011937	Rejected: Supported self-management for asthma helps people adjust their treatment in response to symptom changes. This improves day-to-day control and reduces the risk of asthma attacks and the need for emergency healthcare. However, implementation remains poor in routine clinical practice. T
Møller H.	Møller, H. (2013). "Double culturedness": The "capital" of inuit nurses. International Journal of Circumpolar Health, 72(SUPPL.1) doi:10.3402/ijch.v72i0.21266	Ok
Murray J.J., Hall W.C., Snoddon K.	Murray, J. J., Hall, W. C., & Snoddon, K. (2019). Education and health of children with hearing loss: The necessity of signed languages. [Éducation et santé des enfants souffrant d'une perte de l'acuité auditive: La nécessité des langues des signes] Bulletin of the World Health Organization, 97(10), 711-716. doi:10.2471/BLT.19.229427	Rejected: Medical and educational interventions for children with hearing loss often adopt a single approach of spoken language acquisition through the use of technology, such as cochlear implants.
Mustonen S., Strömmer M.	Mustonen, S., & Strömmer, M. (2022). Becoming a multilingual health professional in vocational education - two adult migrants’ translanguaging trajectories. Journal of Multilingual and Multicultural Development, doi:10.1080/01434632.2022.2116451	Ok
Muth S.	Muth, S. (2018). “The ideal russian speaker is no russian”: Language commodification and its limits in medical tourism to switzerland. Language Policy, 17(2), 217-237. doi:10.1007/s10993-017-9434-6	Rejected: It is the aim of this paper to examine the management of multilingualism in the Swiss healthcareindustry and the negotiation of the oftentimes fluctuating and unstable value of linguistic resources in the care for medical tourists
Napier J., Major G., Ferrara L., Johnston T.	Napier, J., Major, G., Ferrara, L., & Johnston, T. (2015). Medical signbank as a model for sign language planning? A review of community engagement. Current Issues in Language Planning, 16(3), 279-295. doi:10.1080/14664208.2014.972536	Rejected: This paper reviews a sign language planning project conducted in Australia with deaf Auslan users. The Medical Signbank project utilisedcooperative language planning process to engage with the Deaf community and sign language interpreter
Ndawo G.	Ndawo, G. (2019). The influence of language of instruction in the facilitation of academic activities: Nurse educators’ experiences. Health SA Gesondheid, 24 doi:10.4102/hsag.v24i0.1261	OK
Ndou N.N., Omidire M.F.	Ndou, N. N., & Omidire, M. F. (2022). Systemic support for learners with developmental language disorders in zimbabwe and south africa. South African Journal of Communication Disorders, 69(1) doi:10.4102/sajcd.v69i1.850	Rejected: This study aimed to examine systemic support strategies available to learners with developmental language disorder
Nicoara S.-M., Szamoskozi S.-E., Mitrea D.-A., Leucuta D.-C.	Nicoara, S. -., Szamoskozi, S. -., Mitrea, D. -., & Leucuta, D. -. (2020). Concept mapping, an effective tool for long-term memorization of anatomy-a quasi-experimental research carried out among 1st year general medicine students. European Journal of Investigation in Health, Psychology and Education, 10(1), 530-543. doi:10.3390/ejihpe10010038	Ok
Odetunde M.O., Binuyo O.T., Maruf F.A., Ayenowowon S.O., Okonji A.M., Odetunde N.A., Mbada C.E.	Odetunde, M. O., Binuyo, O. T., Maruf, F. A., Ayenowowon, S. O., Okonji, A. M., Odetunde, N. A., & Mbada, C. E. (2020). Development and feasibility testing of video home based telerehabilitation for stroke survivors in resource limited settings. International Journal of Telerehabilitation, 12(2), 125-136. doi:10.5195/ijt.2020.6321	Rejected: Tele-physiotherapy has been shown to be valuable to improve clinical outcomes after stroke. Yet, home-based interventions for stroke survivors (SSVs) who speak indigenous African languages are sparse. This study developed a video-based home exercise programme (VHEP) for SSV speakers of Yoruba.
Omidire M.F.	Omidire, M. F. (2022). Improving learners’ comprehension skills in the early years through group discussion. Early Child Development and Care, 192(1), 159-171. doi:10.1080/03004430.2020.1868999	Rejected: primary education The participants were teachers (n = 12) and learners (n = 134) from four purposively sampled primary schools
Otomo R.	Otomo, R. (2016). New form of national language policy? the case of the economic partnership agreement (EPA) in japan. Asia-Pacific Education Researcher, 25(5-6), 735-742. doi:10.1007/s40299-016-0306-1	Rejected: This paper examines the possible emergence of a new national language policy, embedded in a bilateral economic partnership agreement (EPA) signed between Japan and Southeast Asian countries. Besides its economic orientation, the EPA encourages and regulates the movement of people, in particular migrant healthcare workers
Otomo R.	Otomo, R. (2022). The discourse of self-learning: An analysis of Japan’s EPA programme for healthcare workers from southeast asia. Asian Studies Review, 46(4), 597-616. doi:10.1080/10357823.2022.2069675	Ok
Pacheco M.B., Kang H.-S., Hurd E.	Pacheco, M. B., Kang, H. -., & Hurd, E. (2019). Scaffolds, signs, and bridges: Language ideologies and translanguaging in student-teaching experiences. Bilingual Research Journal, 42(2), 194-213. doi:10.1080/15235882.2019.1596179	Rejected: This study examines preservice teachers’ (PSTs) experiences with language ideologies in clinical placements across an academic year. Using methods derived from phenomenology, it explores how PSTs constructed and contested language ideologies about translanguaging in dual-language and transitional bilingual education elementary classrooms. This study examines preservice teachers’ (PSTs) …
Patel S.G., Firmender W.M., Snowden L.R.	Patel, S. G., Firmender, W. M., & Snowden, L. R. (2013). Qualitative evaluation of mental health services for clients with limited english proficiency. International Journal of Mental Health Systems, 7(1) doi:10.1186/1752-4458-7-27	Rejected: To meet federal requirements under Title VI of the Civil Rights Act, the state of California instituted policies requiring that comprehensive mental health services in native languages be made available to limited English proficiency (LEP) populations
Pelczarski K.M., Yaruss J.S.	Pelczarski, K. M., & Yaruss, J. S. (2014). Phonological encoding of young children who stutter. Journal of Fluency Disorders, 39(1), 12-24. doi:10.1016/j.jfludis.2013.10.003	Rejected: This study investigated the phonological encoding abilities of five- and six-year old children who stutter.
Pesco D., MacLeod A.A.A.N., Kay-Raining Bird E., Cleave P., Trudeau N., de Valenzuela J.S., Cain K., Marinova-Todd S.H., Colozzo P., Stahl H., Segers E., Verhoeven L.	Pesco, D., MacLeod, A. A. A. N., Kay-Raining Bird, E., Cleave, P., Trudeau, N., de Valenzuela, J. S., . . . Verhoeven, L. (2016). A multi-site review of policies affecting opportunities for children with developmental disabilities to become bilingual. Journal of Communication Disorders, 63, 15-31. doi:10.1016/j.jcomdis.2016.05.008	Rejected: This review of special education and language-in-education policies at six sites in four countries (Canada, United States, United Kingdom, and Netherlands) aimed to determine the opportunities for bilingualism provided at school for children with developmental disabilities (DD).
Pill J., Harding L.	Pill, J., & Harding, L. (2013). Defining the language assessment literacy gap: Evidence from a parliamentary inquiry. Language Testing, 30(3), 381-402. doi:10.1177/0265532213480337	Rejected: as part of the current registration process for doctors seeking employment in Australia) were identified and coded using a thematic analysis. Findings reveal misconceptions about who is responsible for tests and for decisions based on scores in this context, as well as misconceptions about language testing procedures
Piller I., Lising L.	Piller, I., & Lising, L. (2014). Language, employment, and settlement: Temporary meat workers in australia. Multilingua, 33(1-2), 35-59. doi:10.1515/multi-2014-0003	Rejected: our paper explores the role of language in the employment and migration trajectories of a group of meat processing workers from the Philippines in a small town in rural Australia.
Pomat N., Jannok A., Buripakdi A., Wilang J.D.	Pomat, N., Jannok, A., Buripakdi, A., & Wilang, J. D. (2022). Partial EMI nursing program: Insights from students and teachers in thailand. Theory and Practice in Language Studies, 12(7), 1386-1396. doi:10.17507/tpls.1207.19	Ok
Pun J., Jin X.	Pun, J., & Jin, X. (2021). Student challenges and learning strategies at hong kong EMI universities. PLoS ONE, 16(5 May) doi:10.1371/journal.pone.0251564	Ok
Pun J.K.H.	Pun, J. K. H. (2021). Comparing veterinary students’ and practitioners’ perceptions of communication in a bilingual context. Veterinary Record, 189(12), no. doi:10.1002/vetr.587	Ok: can be read not downlaod, request through researchgate sent
Pym A.	Pym, A. (2021). Translation and language learning as policy options: Questions of costs and literacy development. Translation and Interpreting, 13(1), 24-37. doi:10.12807/TI.113201.2021.A02	Ok
Qi J.J., Dauvergne P.	Qi, J. J., & Dauvergne, P. (2022). China and the global politics of nature-based solutions. Environmental Science and Policy, 137, 1-11. doi:10.1016/j.envsci.2022.08.008	Rejected: Explains how and why China has been promoting nature-based solutions in multilateral and domestic policy settings. By analyzing the content of English- and Chinese-language policy briefings, diplomatic remarks
Raffegeau T.E., Haddad J.M., Huber J.E., Rietdyk S.	Raffegeau, T. E., Haddad, J. M., Huber, J. E., & Rietdyk, S. (2018). Walking while talking: Young adults flexibly allocate resources between speech and gait. Gait and Posture, 64, 59-62. doi:10.1016/j.gaitpost.2018.05.029	rejected: To understand how young adults accomplish the multitask behavior of walking while talking as the gait challenge was systematically manipulated.
Restrepo M.A., Morgan G.P., Thompson M.S.	Restrepo, M. A., Morgan, G. P., & Thompson, M. S. (2013). The efficacy of a vocabulary intervention for dual-language learners with language impairment. Journal of Speech, Language, and Hearing Research : JSLHR, 56(2), 748-765. Retrieved from www.scopus.com	Rejcted: the authors evaluated the efficacy of a Spanish-English versus English-only vocabulary intervention for dual-language learners (DLLs) with language impairment compared to mathematics intervention groups and typically developing controls with no intervention.
Rodis O.M.M., Barroga E., Barron J.P., Hobbs J., Jayawardena J.A., Kageyama I., Kalubi B., Langham C., Matsuka Y., Miyake Y., Seki N., Oka H., Peters M., Shibata Y., Stegaroiu R., Suzuki K., Takahashi S., Tsuchiya H., Yoshida T., Yoshimoto K.	Rodis, O. M. M., Barroga, E., Barron, J. P., Hobbs, J., Jayawardena, J. A., Kageyama, I., . . . Yoshimoto, K. (2015). A proposed core curriculum for dental english education in japan. BMC Medical Education, 14(1) doi:10.1186/s12909-014-0239-4	Ok
Rodis O.M.M., Matsumura S., Kariya N., Nishimura M., Yoshida T.	Rodis, O. M. M., Matsumura, S., Kariya, N., Nishimura, M., & Yoshida, T. (2013). Undergraduate dental english education in japanese dental schools. Journal of Dental Education, 77(5), 656-663. Retrieved from www.scopus.com	Ok
Roshini K., Philip J.M., Abraham H.M., Venkatakrishnan C.J., Chandran C.R.	Roshini, K., Philip, J. M., Abraham, H. M., Venkatakrishnan, C. J., & Chandran, C. R. (2018). Language proficiency and perceived drawbacks among undergraduate dental students in a south indian dental college. Drug Invention Today, 10(8), 1487-1489. Retrieved from www.scopus.com	Ok
Rossouw K., Pascoe M.	Rossouw, K., & Pascoe, M. (2018). Intervention for bilingual speech sound disorders: A case study of an isixhosa–english-speaking child. South African Journal of Communication Disorders, 65(1) doi:10.4102/sajcd.v65i1.566	Rejected: To describe changes in a bilingual child’s speech following intervention based on a theoretically motivated and tailored intervention plan.
Rotzoll M., Grüner F.	Rotzoll, M., & Grüner, F. (2016). Emil kraepelin and german psychiatry in multicultural Dorpat/Tartu, 1886-1891. Trames, 20(4), 351-367. doi:10.3176/tr.2016.4.03	Rejected: What translation processes were performed by whom over the working therapeutic day, and what were the effects of this partial loss of speech on clinical research? What opportunities resulted from precisely this multi-lingual situation in a contact zone between Western Europe and Russia for psychiatric science and practice? This paper attempts to provide some preliminary answers to these…
Sadoway D.	Sadoway, D. (2021). The language of teaching voice: A qualitative study. Voice and Speech Review, 15(1), 51-63. doi:10.1080/23268263.2020.1751413	Rejected: This article outlines a qualitative research study assessing the effectiveness of using metaphorical or scientific language or both for improving student and client outcomes in the voice studio, the speech-language pathology clinic, and in performance
Saha S., Koley M., Ghosh A., Mondal R., Arya J.S., Choubey G.	Saha, S., Koley, M., Ghosh, A., Mondal, R., Arya, J. S., & Choubey, G. (2013). A survey on perception of homoeopathic undergraduate students towards learning environment in an indian scenario. International Journal of High Dilution Research, 12(43), 62-76. Retrieved from www.scopus.com	Ok
Salamonson Y., Glew P.J., Ramjan L.M., Jefferies D., Maneze D., Crook B., Everett B.	Salamonson, Y., Glew, P. J., Ramjan, L. M., Jefferies, D., Maneze, D., Crook, B., & Everett, B. (2021). Psychometric evaluation of the 11-item english language usage scale in commencing nursing students. Nurse Education Today, 96 doi:10.1016/j.nedt.2020.104599	Ok
Schleicher N., Suni M.	Schleicher, N., & Suni, M. (2021). Healthcare professionals on the move: Investing in learning a new language for work. [Terveydenhuollon ammattilaiset liikkeellä: Työssä tarvittavan kielen oppimiseen investoiminen] Lahivordlusi Lahivertailuja, 31, 191-228. doi:10.5128/LV31.06	Ok
Schröder L., Dintsioudi A., List M.K., Keller H.	Schröder, L., Dintsioudi, A., List, M. K., & Keller, H. (2019). Teachers’ conversational style and Children’s language development in german childcare centers: A culture-sensitive intervention. Journal of Cross-Cultural Psychology, 50(2), 164-184. doi:10.1177/0022022118812174	Rejected: we implemented an everyday-based language intervention in four German childcare centers. In a prepost design, teachers
Schuster M., Elroy I., Elmakais I.	Schuster, M., Elroy, I., & Elmakais, I. (2017). We are lost: Measuring the accessibility of signage in public general hospitals. Language Policy, 16(1), 23-38. doi:10.1007/s10993-015-9400-0	Rejected: Hospital signage is a critical element in the patients’ and visitors understanding of directions, instructions and warnings in the facility. In multilingual environments organizations need to make sure that the information is accessible in the languages of the people who consume their services.
Seabi J., Seedat J., Khoza-Shangase K., Sullivan L.	Seabi, J., Seedat, J., Khoza-Shangase, K., & Sullivan, L. (2014). Experiences of university students regarding transformation in south africa. International Journal of Educational Management, 28(1), 66-81. doi:10.1108/IJEM-01-2012-0017	Ok
Semsar A., McGowan H., Feng Y., Zahiri H.R., Park A., Kleinsmith A., Mentis H.M.	Semsar, A., McGowan, H., Feng, Y., Zahiri, H. R., Park, A., Kleinsmith, A., & Mentis, H. M. (2020). Quality of and attention to instructions in telementoring. Proceedings of the ACM on Human-Computer Interaction, 4(CSCW2) doi:10.1145/3415236	Rejected: we leveraged the unique environment of laparoscopic surgery to compare the efficacy and mechanism of instruction in a collocated and distributed condition
Sharma A.	Sharma, A. (2021). Whither the irish language act? language policies in northern ireland. Current Issues in Language Planning, 22(3), 308-327. doi:10.1080/14664208.2020.1846902	Rejected: This paper examines language policies in Northern Ireland vis-à-vis the Irish language. Whilst the devolution of powers has benefitted Welsh and Scottish Gaelic through the creation of separate language acts dedicated to them, there is no such act for Irish
Showstack R.E., Guzman K., Chesser A.K., Woods N.K.	Showstack, R. E., Guzman, K., Chesser, A. K., & Woods, N. K. (2019). Improving latino health equity through spanish language interpreter advocacy in kansas. Hispanic Health Care International, 17(1), 18-22. doi:10.1177/1540415318818706	Rejcted: medical translation services, we present health disparities affecting Latinos in Kansas, examine the state’s language access policies for health care, and argue that health disparities could be reduced through improved language access
Simon-Cereijido G., Gutiérrez-Clellen V.F., Sweet M.	Simon-Cereijido, G., Gutiérrez-Clellen, V. F., & Sweet, M. (2013). Predictors of growth or attrition of the first language in latino children with specific language impairment. Applied Psycholinguistics, 34(6), 1219-1243. doi:10.1017/S0142716412000215	Rejected: We investigated the factors that may help understand the differential rates of language development in the home language (i.e., Spanish) of Latino preschoolers with specific language impairment.
Sobane K., van der Merwe C., Shandu B.	Sobane, K., van der Merwe, C., & Shandu, B. (2020). The silence of south african health policies on the language barrier between healthcare providers and patients. Language Matters, 51(3), 87-107. doi:10.1080/10228195.2020.1794017	Rejected: The language barrier continues to compromise adequate healthcare delivery in multilingual healthcaresystems. This makes language an important issue for the policy agenda in such systems.
Sreedevi P.A., Aswathy B.L., Roy N.	Sreedevi, P. A., Aswathy, B. L., & Roy, N. (2018). A correlational study on assertiveness and self esteem of undergraduate students of a selected college of nursing, ernakulam. Indian Journal of Public Health Research and Development, 9(6), 49-55. doi:10.5958/0976-5506.2018.00522.3	Ok
Srinivasan K., Gilchrist J.M., Krishnan G., Wilkins A., Allen P.M.	Srinivasan, K., Gilchrist, J. M., Krishnan, G., Wilkins, A., & Allen, P. M. (2019). Clinical use of the kannada and english rate of reading tests. Frontiers in Psychology, 10 doi:10.3389/fpsyg.2019.02116	Rejcted: These children were recruited from four private and five state schools in Udupi Taluk that had English and Kannada, india
Srinivasan K., Krishnan G., Wilkins A., Allen P.	Srinivasan, K., Krishnan, G., Wilkins, A., & Allen, P. (2018). Reliability and validity of a kannada rate of reading test. Indian Journal of Ophthalmology, 66(5), 630-633. doi:10.4103/ijo.IJO_807_17	Rejected: Children were recruited from state and private schools that used Kannada or English as the medium of instruction
Taur S., Karande S., Saxena A.A., Gogtay N.J., Thatte U.M.	Taur, S., Karande, S., Saxena, A. A., Gogtay, N. J., & Thatte, U. M. (2014). Use of computerized tests to evaluate psychomotor performance in children with specific learning disabilities in comparison to normal children. Indian Journal of Medical Research, 140, 644-648. Retrieved from www.scopus.com	Rejected: Use of computerized tests to evaluate psychomotor performance in children with specific learning disabilities in comparison to normal children
Tayem Y.I., Alshammari A., Albalawi N., Shareef M.	Tayem, Y. I., Alshammari, A., Albalawi, N., & Shareef, M. (2020). Language barriers to studying medicine in english: Perceptions of final-year medical students at the arabian gulf university. [Barrières linguistiques aux études de médecine en anglais: Perception des étudiants de dernière année de médecine à l’université du Golfe Arabique] Eastern Mediterranean Health Journal, 26(2), 233-238. doi:…	Ok
Thordardottir E.	Thordardottir, E. (2021). Adolescent language outcomes in a complex trilingual context: When typical does not mean unproblematic. Journal of Communication Disorders, 89 doi:10.1016/j.jcomdis.2020.106060	Rejected: This study examined the long-term language outcomes of adolescents in the complex multilingual context of Iceland, where children learn Icelandic as a first (L1) or second language (L2)..
Ullah R., Ghabbani H.M., Bahabri R.H., Zafar M.S.	Ullah, R., Ghabbani, H. M., Bahabri, R. H., & Zafar, M. S. (2021). Fluoridated and non-fluoridated pediatric toothpastes, available over-the-counter, in pakistan and saudi arabia: An observational study. Fluoride, 54(1), 15-26. Retrieved from www.scopus.com	Rejected: The aim of the present observational study was to compare a variety of pediatric toothpastes, available commercially over-the-counter, in Pakistan and Saudi Arabia. Pediatric toothpastes were purchased from the major pharmacy outlets present in both countries.
Uzogara E.E.	Uzogara, E. E. (2021). Who belongs in america? latinxs’ skin tones, perceived discrimination, and opposition to multicultural policies. Cultural Diversity and Ethnic Minority Psychology, 27(3), 354-368. doi:10.1037/cdp0000421	Rejected: Consequences of colorism are well documented, yet little is known about its relationship with political views of racial/ethnic minorities. Although a very small literature found no evidence that skin tone shapes political attitudes of Latinx Americans, the present study was the first to extend this to immigration and language policy preferences
Van Laere E., Agirdag O., Van Braak J.	Van Laere, E., Agirdag, O., & Van Braak, J. (2016). Supporting science learning in linguistically diverse classrooms: Factors related to the use of bilingual content in a computer-based learning environment. Computers in Human Behavior, 57, 428-441. doi:10.1016/j.chb.2015.12.056	Rejected: Computer-based learning environments (CBLEs) are a promising means to support language minority (LMi) students in acquiring knowledge and skills through the integration of authentic support in their home language. This study aimed to determine the use of scientific bilingual content offered to fourth-grade students
Van Oss V., Struys E., Van Avermaet P., Vantieghem W.	Van Oss, V., Struys, E., Van Avermaet, P., & Vantieghem, W. (2021). What prompts early childhood professionals to proffer advice to multilingual families? investigating the association between language policy and perceived self-efficacy. Journal of Multilingual and Multicultural Development, doi:10.1080/01434632.2021.1960358	Rejected: Early childhood professionals can act as catalysts in encouraging home language maintenance in multilingual families. However, there is a dearth of research on whether these professionals advise parents to speak their home language(s) to their offspring, and furthermore, little is known about what prompts professionals to proffer language advice. To respond to these queries, we relied o…
Van Oss V., Van Avermaet P., Struys E., Vantieghem W.	Van Oss, V., Van Avermaet, P., Struys, E., & Vantieghem, W. (2022). An empirical validation study of spolsky's language policy model. Current Issues in Language Planning, 23(1), 77-95. doi:10.1080/14664208.2021.1907060	Ok
Van Oss V., Vantieghem W., Struys E., Van Avermaet P.	Van Oss, V., Vantieghem, W., Struys, E., & Van Avermaet, P. (2022). A quantitative analysis of the language policy processes in early childhood professionals’ advice on multilingual parenting. Current Issues in Language Planning, doi:10.1080/14664208.2022.2100679	Rejected: Whereas early childhood professionals can play a pivotal role in fostering young children’s home language development, little is known about what determines the kind of multilingual parenting advice they offer families. The objective of this study was to deconstruct the processes culminating in two types of such recommendations: advice highlighting the usage of the home language in the …
Vaz C.J., Pothiyil T.D., George L.S., Alex S., Pothiyil D.I., Kamath A.	Vaz, C. J., Pothiyil, T. D., George, L. S., Alex, S., Pothiyil, D. I., & Kamath, A. (2018). Factors influencing examination anxiety among undergraduate nursing students: An exploratory factor analysis. Journal of Clinical and Diagnostic Research, 12(7), JC16-JC19. doi:10.7860/JCDR/2018/35878.11817	Ok
Waber D.P., Boiselle E.C., Yakut A.D., Peek C.P., Strand K.E., Bernstein J.H.	Waber, D. P., Boiselle, E. C., Yakut, A. D., Peek, C. P., Strand, K. E., & Bernstein, J. H. (2021). Developmental dyspraxia in children with learning disorders: Four-year experience in a referred sample. Journal of Child Neurology, 36(3), 210-221. doi:10.1177/0883073820966913	Rejected: The term apraxia is clearly understood in adult behavioral neurology, with assessment of gesture central to the diagnosis
Wang X., Bi Q., Lu J., Chan P., Hu X., Su L., Jessen F., Lin H., Han C., Shu N., Liu H., Han Y.	Wang, X., Bi, Q., Lu, J., Chan, P., Hu, X., Su, L., . . . Han, Y. (2022). Difference in amyloid load between single memory domain and multidomain subjective cognitive decline: A study from the SILCODE. Journal of Alzheimer's Disease, 85(4), 1573-1582. doi:10.3233/JAD-215373	Rejected: We aim to explore the difference in amyloid load between the single memory domain SCD (sd-SCD) and the multidomain SCD (md-SCD) and assess the relationship of amyloid pathology with quantitative SCD scores and objective cognition
Waterval D., Frambach J.M., Scott S.M., Driessen E.W., Scherpbier A.J.J.A.	Waterval, D., Frambach, J. M., Scott, S. M., Driessen, E. W., & Scherpbier, A. J. J. A. (2018). Crossborder curriculum partnerships: Medical students' experiences on critical aspects. BMC Medical Education, 18(1) doi:10.1186/s12909-018-1239-6	Ok
Wilang J.D., Nupong S.	Wilang, J. D., & Nupong, S. (2022). Factors affecting EMI attitudes of engineering and nursing students. Theory and Practice in Language Studies, 12(3), 437-446. doi:10.17507/tpls.1203.03	Ok
Yang M., O'Sullivan P.S., Irby D.M., Chen Z., Lin C., Lin C.	Yang, M., O'Sullivan, P. S., Irby, D. M., Chen, Z., Lin, C., & Lin, C. (2019). Challenges and adaptations in implementing an english-medium medical program:A case study in china. BMC Medical Education, 19(1) doi:10.1186/s12909-018-1452-3	Ok
Yorgancılar A.E., Sizer B.	Yorgancılar, A. E., & Sizer, B. (2022). Evaluation of the language development of children with cochlear implant users living in a multilingual environment. International Journal of Pediatric Otorhinolaryngology, 152 doi:10.1016/j.ijporl.2021.111007	Rejected: To evaluate the effect of second language exposure on Turkish speaking skills in cochlear implant (CI) users
Yousif M.A., Eldalo A.S., Abd Allah M.A., Al-Sawat M.A., Al-Wahaibi H.M., Al-Osaimi A.A.S., Al-Gethami S.H.	Yousif, M. A., Eldalo, A. S., Abd Allah, M. A., Al-Sawat, M. A., Al-Wahaibi, H. M., Al-Osaimi, A. A. S., & Al-Gethami, S. H. (2014). Pharmacy education instruction: Preference and practices, saudi students' perception. Saudi Pharmaceutical Journal, 22(4), 309-314. doi:10.1016/j.jsps.2013.06.005	Ok
